# *Salmonella* stress management and its relevance to behaviour during intestinal colonisation and infection

Ivan Rychlik <sup>a,\*</sup>, Paul A. Barrow <sup>b</sup>

<sup>a</sup> *Veterinary Research Institute, Hudcova 70, 621 32 Brno, Czech Republic*

<sup>b</sup> *Institute for Animal Health, Compton, Newbury, Oxfordshire, RG20 7NN, UK*

Received 7 December 2004; received in revised form 4 March 2005; accepted 30 March 2005

First published online 29 June 2005

## Abstract

The enteric pathogen *Salmonella enterica* is exposed to a number of stressful environments during its life cycle within and outside its various hosts. During intestinal colonisation *Salmonella* is successively exposed to acid pH in the stomach, to the detergent-like activity of bile, to decreasing oxygen supply, to the presence of multiple metabolites produced by the normal gut microflora and finally it is exposed to cationic antimicrobial peptides present on the surface of epithelial cells. There are four major regulators controlling relevant stress responses in *Salmonella*, namely RpoS, PhoPQ, Fur and OmpR/EnvZ. Except for Fur, inactivation of genes encoding the other stress regulators results in attenuated virulence and such mutants can therefore be considered as vaccine candidates. In contrast, a decrease in oxygen supply monitored by Fnr and ArcAB, or oxidative stress controlled by OxyR and SoxRS is not regarded as a stress associated with host colonisation since inactivation of either of these systems does not result in reductions in colonisation. The role of quorum-sensing through *luxS* and *sdhA* is also considered as a regulator of virulence and colonisation.

© 2005 Federation of European Microbiological Societies. Published by Elsevier B.V. All rights reserved.

**Keywords:** *Salmonella*; Acid resistance; Bile; Cationic antimicrobial peptide; Heat shock; Virulence; Quorum sensing; Short chain fatty acid

## Contents

|                                                                                                    |      |
|----------------------------------------------------------------------------------------------------|------|
| 1. Introduction . . . . .                                                                          | 1022 |
| 2. Stresses encountered by <i>Salmonella</i> on entering the host – resistance to low pH . . . . . | 1022 |
| 2.1. RpoS and the acid stress response . . . . .                                                   | 1023 |
| 2.2. Fur and the acid stress response . . . . .                                                    | 1024 |
| 2.3. PhoPQ and the acid stress response . . . . .                                                  | 1024 |
| 2.4. OmpR/EnvZ and the acid stress response . . . . .                                              | 1025 |
| 3. <i>Salmonella</i> inside the gut . . . . .                                                      | 1026 |
| 3.1. Heat and outer membrane shock . . . . .                                                       | 1026 |
| 3.2. Osmotic shock . . . . .                                                                       | 1026 |
| 3.3. Response to bile . . . . .                                                                    | 1027 |
| 3.4. Switch from aerobiosis to microaerobiosis and anaerobiosis inside the gut . . . . .           | 1027 |

\* Corresponding author. Tel.: +420 533331201/541321241;

fax: +420 541211229/542211229.

E-mail address: rychlik@vri.cz (I. Rychlik).

|      |                                          |      |
|------|------------------------------------------|------|
| 3.5. | Interaction with gut microflora. . . . . | 1028 |
| 3.6. | Cationic antimicrobial peptides. . . . . | 1031 |
| 4.   | Concluding remarks. . . . .              | 1032 |
|      | Acknowledgements . . . . .               | 1034 |
|      | References . . . . .                     | 1034 |

## 1. Introduction

An enteric bacterial pathogen such as *Salmonella* is exposed to a number of stressful environments during its life cycle and the ways in which it responds to different and multiple stresses are correspondingly complex. Stress occurs when the bacterial cell experiences sudden changes in its environment. Under laboratory conditions *Salmonella* may experience stress naturally when nutrients or electron acceptors become limited and *Salmonella* enters the stationary phase of growth. Outside the laboratory, in the organism's real life, this may happen whenever *Salmonella* enters a host from the environment but also when *Salmonella* leaves the host into the environment. Genes and proteins identified as being central to the mechanism employed by the bacterium to cope with stress, particularly those involved in first contact with the host, may act as potential targets for immune intervention. The major stress factors and the genes and proteins required for control of stress management by *Salmonella* are the subject of this review. Naturally, different serotypes (or even different strains within a given serotype) may respond differently to various stresses. Therefore, if not specifically stated, information given in this review was obtained by experiments with the two most frequent serovars Typhimurium and Enteritidis and may not necessarily be representative of other serotypes.

## 2. Stresses encountered by *Salmonella* on entering the host – resistance to low pH

When *Salmonella* enters a host, it first senses an increase in temperature followed by a dramatic change in pH. In the stomach, the pH suddenly drops to values which may approach 1–2, although locally the pH can be higher as a result of the buffering capacity of feed. From the point of view of acid stress adaptation, animal hosts may be divided into those with simple or more complex stomach systems, exemplified for the purposes of this review by mice, pigs and humans, and on the other hand gallinaceous birds. In non-ruminant mammals, *Salmonella* and other bacteria pass immediately

to the stomach on ingestion. In gallinaceous birds including the chicken, *Salmonella* first reaches the crop where the pH is between 4 and 5, as a result of bacterial lactic acid fermentation, a pH which enables *Salmonella* to adapt to much higher  $\Delta H^+$  and thereby resist the antibacterial effects of the stomach.

*Salmonella* is relatively resistant to low pH when in the stationary phase of growth [1]. When growing exponentially, however, it is less acid resistant and can survive exposure only to moderately low pH values of between 4 and 5. However, in both the cases, *Salmonella* can become more acid resistant after a short period of adaptation at moderate pH. This phenomenon is called the acid tolerance response (ATR) [1–4]. When this occurs in exponentially growing cells, there are two distinct steps to adaptation. Transient adaptation is achieved after 20 min exposure to moderate pH with a second level of sustained adaptation requiring  $\approx 60$  min of exposure.

The proteins and genes induced by *Salmonella* in response to low pH can be identified by a number of techniques, including the generation of random promoter fusions and selection of the promoters of genes induced specifically under low pH. This approach has allowed the identification of genes coding for proteins related to cell-surface structure and maintenance (*aas*, *pbpA* and *cld*), stress response (*dps* and *rna*) and generalised efflux pump *mar* and *emr* [5]. However, although individual effector proteins are important for acid survival, regulatory proteins are equally important. *Salmonella* harbours several regulators which enable it to adapt to acidification, especially those controlled by RpoS, Fur, PhoPQ, and OmpR/EnvZ. Two of them, PhoPQ and OmpR/envZ, are two-component signal transduction systems while the other two genes/proteins operate apparently individually in the bacterial cytoplasm. *rpoS* and *fur* are essential for response to low pH induced by organic acids in log phase while the *phoPQ* system is tuned to response to inorganic low pH stress [6]. *ompR/envZ* is necessary for acid resistance in stationary phase cells [7,8]. An additional gene, *oxrG* is also involved in regulation of the low pH response although almost nothing is known about its function [9].

### 2.1. RpoS and the acid stress response

RpoS is one of the sigma subunits of RNA polymerase. It was first described in *Escherichia coli* and subsequently in *Salmonella* where, in addition to its association with the starvation stress response and virulence it was found to be associated with acid response [10]. RpoS binds the core RNA polymerase primarily under stress conditions and controls the expression of a specific subset of genes which increases resistance to a variety of stresses. In vitro RpoS is expressed in stationary phase during nutrient limitations [11] or in a low pH environment [12–14]. RpoS is known to be expressed also in vivo in the eucaryotic intracellular environment [13]. Genes known to belong to the RpoS regulon in *Salmonella* include *spv* [15–17], *ots* [18], *katE* [13], *poxB* and *ogt* [19], or *narZYWV* [20]. There are also more than 10 other open reading frames (ORFs) of unknown function regulated by RpoS in stationary phase of growth [19] and 7 other loci regulated after exposure to low pH [14]. As a consequence, *rpoS* mutants are defective of prolonged survival in nutrient-depleted media or survival in low pH environment. Genes regulated by RpoS in *E. coli* are better described [21] and it can be expected that majority of genes regulated by RpoS in *E. coli* will be regulated in the same manner in *Salmonella*.

The *rpoS* regulon in *Salmonella* in stationary phase is responsible for stress tolerance including resistance to pH. RpoS is also involved in the log phase *Salmonella* acid tolerance response. To observe the log phase *rpoS*-dependent acid resistance, the adaptation period must last for at least 60 min. During such a period of adaptation (upto 120 min), a subset of about 50 proteins is induced [22], seven of which are RpoS-dependent [14]. Shorter moderate acid adaptation also increases total acid resistance of *Salmonella* but this process is *rpoS*-independent and requires functional Fur protein (see below). During the adaptation period, the intracellular level of RpoS increases. Because RpoS competes for the core RNA polymerase with the other sigma subunits [23], when more RpoS is available in the cytoplasm, more RNA polymerase interacts with it resulting in greater induction of the RpoS regulon.

Consistent with the central role of *rpoS* in the stress response in *Salmonella* is its complex regulation. Total *rpoS* expression is controlled at all levels starting from transcription [24–26], regulation of mRNA stability, translational efficiency, and regulation of RpoS proteolysis. Stability and efficiency of translation of *rpoS* mRNA is controlled by small regulatory RNAs such as DsrA or RprA [27–29]. Interestingly, the DsrA RNA in conjunction with Hfq can positively regulate RpoS translation but suppress H-NS expression by stabilisation of *rpoS* mRNA but increasing turnover of *hms* mRNA [27]. In log phase acid-shocked *Salmonella*, the

level of RpoS can increase by increased translation through a mechanism independent of DsrA and RprA. The 566 nt untranslated 5' end region (UTR) of the *rpoS* mRNA controls acid shock-induced translation. Except for the initial 51 nucleotides of the mRNA, the remaining part of the untranslated region is essential for acid induced increases in translation, probably due to the formation of competing stem loop structures of UTR of *rpoS* mRNA in response to acid shock [30]. Thus, on passage through the stomach transcription of the whole set of *rpoS*-regulated genes is likely to be initiated, with associated increases in resistance to a number of other stresses. The pH of the small intestine is between 6 and 7, due to the presence of organic acids including short chain fatty acids (SCFA) produced by the normal microflora, mainly lactic acid bacteria and buffered by bicarbonate ions. These acids can be toxic to *Salmonella*; however, acid tolerance, induced in the stomach, also protects *Salmonella* against their action [31]. As a corollary, contact with increased concentrations of SCFA also results into increased acid resistance in *Salmonella* [32] which may, thus, maintain a degree of acid resistance prior to entry of *Salmonella* into host cells and the phagolysosome where pH values are around 5. Interestingly, SCFA also induce expression of the *spv* genes [33], known to be necessary for *Salmonella* intracellular survival. *Salmonella* can therefore utilise changes in pH to monitor the environment and modulate the infection process.

RpoS levels can also increase by decreased protein degradation. This is dependent on the ClpXP protease complex and MviA (RssB) [12,34,35]. RssB is a response regulator in which the phosphorylated form exhibits a high affinity for RpoS and makes it available to proteolytic degradation by ClpXP [36]. Mutants with inactivated *mviA* (*rssB*) or *clpP* thus accumulate higher levels of RpoS even in non-stressed cells and are generally more acid resistant [12].

*rpoS* null mutants are attenuated for mice both after per oral and intraperitoneal routes of infection [37]. Nickerson and Curtiss found that RpoS-regulated genes are essential for colonisation of gut-associated lymphoid tissue despite the fact that the *rpoS* mutant colonised the gut as efficiently as did the wild-type strain [38]. This would indicate that *rpoS* mutants are attenuated mainly due to the regulation of *spv* genes during the systemic phase of disease and not due to decreased acid resistance during passage through stomach. Consistent with this are observations showing that *ClpP* or *MviA* mutants, with increased RpoS levels and increased acid resistance, are also of attenuated virulence for mice [12,39]. In chickens the situation seems to be different from mice. We did not find a difference in virulence of the wild-type strain and *rpoS* mutants of *S. typhimurium* and *S. enteritidis* for chickens after oral infection [40]. Another experiment showed that of three wild-type strains with

a naturally defective *rpoS* gene, only two were attenuated for chickens while one of them was fully virulent [41]. Whether acid pre-adaptation of *Salmonella* in the crop of birds, which is missing in mammals, plays any role in these apparently contradictory results in mice and chicken remains unclear.

## 2.2. *Fur* and the acid stress response

The Fur protein is usually linked to the regulation of bacterial iron metabolism. Upon complexing with  $\text{Fe}^{2+}$ , Fur recognises a specific DNA sequence, the *fur* box and binds to it. The consensus *fur* box is 19 bp long GAT-AATGATAATCATTATC sequence and it is most frequently found between the  $-35$  and  $-10$  sequences of sigma 70 promoters. When  $\text{Fe}^{2+}$ -Fur is bound to the *fur* box, gene transcription is prevented. If iron becomes limiting,  $\text{Fe}^{2+}$  dissociates from the complex making Fur unable to bind and thus allowing the transcription of normally repressed genes. Because the Fur regulon includes genes for iron uptake and transport, such regulation results in increased expression of genes for the efficient iron uptake only when iron is a growth-limiting factor [42]. Despite the fact that Fur is primarily a negative regulator, it can also act as a positive regulator since at least nine proteins require the presence of both Fur and iron for their expression and six proteins require a functional Fur free of iron for their expression [43]. However, in such cases it is not clear whether Fur directly regulates such genes or whether this may be caused by the indirect action of Fur as a negative regulator of a second negative regulator.

Surprisingly, it was found that *fur* mutants show reduced adaptation to acidification [2,43]. Proteins regulated by Fur in response to iron starvation or low pH form two distinct clusters with the exception of seven proteins which are influenced by both these factors. Like RpoS, Fur is also involved in the acid tolerance response of log phase cells [14,43], and predominantly responds to organic acid stress [6]. Unlike RpoS, Fur is essential for rapid but transient induction of a set of proteins at  $\sim\text{pH}$  5 which allows *Salmonella* to survive subsequent challenge at pH 3. This set of proteins is induced 20–40 min post-exposure to pH 5 but it disappears after 60 min exposure, during which time RpoS-controlled systems of ATR are induced [14,22].

Why Fur integrates the iron and pH responses is not known. A possible explanation for this observation is that in the acid environment,  $\text{Fe}^{3+}$  is more easily available and consequently, intracellular iron concentration increases. However, experimental increases or decreases of iron at neutral pH did not result in increased acid resistance in either *Salmonella* or *Helicobacter pylori* [44,45], and pH-regulated genes do not respond to iron availability [9]. Finally, Hall and Foster showed that the iron and acid regulation of Fur can be separated

genetically. Mutation H90R of the Fur protein sequence resulted in the mutant showing a deregulated iron response but still being capable of an acid tolerance response. Histidine 90 of the Fur primary structure is therefore indispensable for iron-dependent regulation but is not necessary for pH-dependent regulation [45].

None of this, however, explains why evolution selected for Fur sensing both iron concentration and pH. Although iron is the fifth most important ion for the living cell, its excess can be toxic. The primary reason for this is Fenton's reaction during which  $\text{Fe}^{2+}$  is responsible for generation of toxic hydroxyl radicals from hydrogen peroxide which can damage cellular structures [46]. Because exposure to low pH also leads to oxidative stress, it is thus possible that the unifying action of Fur lies in its protection against oxidative damage. This may be supported by observations in *E. coli* where levels of *fes* or *ydiE* mRNA, genes controlled by  $\text{Fe}$ -Fur, were found to be the same in *fur* mutants as in the wild-type strain when treated with  $\text{H}_2\text{O}_2$  [47]. If oxidative stress is caused by excess of iron, this could lead to the cell attempting to limit iron uptake. Recently, Fur has been associated also with the response and resistance to nitrosative stress [47,48]. Furthermore, a number of Fur protein molecules per bacterial cell (5000–10,000) is much more than that of typical transcriptional regulators [49]. It is therefore possible that the function of Fur is slightly different from more usually understood regulatory proteins. Little is known about identity of acid-induced Fur-regulated genes [9]. As a result of this, it would be interesting to compare the promoter sequences of known Fur-regulated genes responsive to iron restriction, acid pH and nitrosative stress and analyse the presence or absence of *fur* boxes in them. And the most surprisingly, despite the in vitro results showing clearly a role for Fur in different stress responses, a *fur* mutant of *S. typhimurium* SL1344 was only weakly attenuated both after per oral and intra-peritoneal application [50]. Although question remains to what extent *S. typhimurium* SL1344 is suitable for creating *fur* deletions since the SL1344 clone available in our laboratory, at least, is of quite an unusual morphology (Fig. 1) and since *fur* mutants are known to form filamentous cells [46], it cannot be excluded that SL1344 is naturally *fur* deficient or *fur* mis-regulated.

## 2.3. *PhoPQ* and the acid stress response

*phoPQ* is a two-component signal transduction system present not only in *Salmonella* [51] but also in *E. coli*, *Shigella* and *Yersinia* [52]. PhoQ is a membrane-bound sensor protein and PhoP is the transcriptional regulator. PhoQ senses  $\text{Mg}^{2+}$  and  $\text{Ca}^{2+}$  concentration and when these decrease to micromolar levels, it phosphorylates PhoP [53,54]. The PhoPQ regulon consists of  $\approx 40$  proteins, most of which are

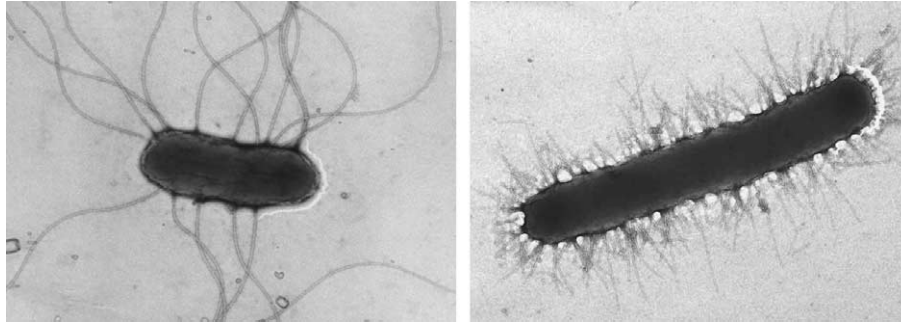

Fig. 1. Phosphotungstic acid stained 24 h old cultures of *S. typhimurium*. Left panel: typical shape of *S. typhimurium* LT2 cell. Right panel: elongated cell of *S. typhimurium* SL1344. Figures kindly provided by P. Kulich, VRI Brno, Czech Republic.

positively regulated. PhoP-suppressed genes include *prgH* and *fliC* [55–57], PhoP-activated genes include *pmrAB*, another two-component signal transduction system involved primarily in the protection of *Salmonella* to cationic antimicrobial peptides (CAMP, see below) [58], *mgtA* and *mgtCB* encoding  $Mg^{2+}$  transport systems, *phoN*, a periplasmic non-specific acid phosphatase, *pcgL* encoding a periplasmic D-Ala–D-Ala dipeptidase, or *pagL*, *pagP* and *pgtE* which contribute to increased resistance to CAMPs [59–62].

The *phoPQ* regulon is essential for *Salmonella* intracellular survival where it increases resistance to antimicrobial peptides [63], suppresses SPI-1 encoded genes necessary for *Salmonella* entry to non-professional phagocytic cells [56,57] and contributes to the expression of SPI-2 genes [64] although the SPI-2 regulation is confusing and at least some of the SPI-2 genes can be expressed independently of PhoPQ [65].

Although the main signal which controls expression of the *phoPQ* regulon is low  $Mg^{2+}$  concentration [62], moderate pH and low ionic strength are also known to influence expression of this regulon [66]. *phoP* was among the first genes shown to be involved in the acid tolerance response as a mutation in *phoP* eliminated adaptation to low pH [3]. Later it was shown that the main role of the *phoPQ*-dependent acid tolerance response is *Salmonella* protection to inorganic acid stress [6]. This is consistent with PhoPQ activation within the *Salmonella*-containing vacuole, the environment of which is expected to be of relatively low complexity and in which acid stress can be caused by an increase in  $H^+$  concentration.

#### 2.4. *OmpR/EnvZ* and the acid stress response

The *OmpR/EnvZ* signal transduction system is usually associated with osmolarity-dependent regulation of the *OmpC* and *OmpF* porins. Under low osmolarity, *OmpF* is preferentially synthesised and under high osmolarity *OmpC* is one of the major outer membrane proteins [67]. The changes in osmolarity are sensed by *EnvZ*. In the presence of a signal, *EnvZ* autophosphory-

lates at histidine 243 and transfer the phosphate to aspartate 55 of *OmpR* [68]. Phosphorylated *OmpR* binds to DNA and activates transcription of target genes. *ompC* was found to be induced also upon *Salmonella* shift to low pH and such induction was dependent on *OmpR* [9]. This effect is also common to *E. coli* [69]. Interestingly, *EnvZ* was not absolutely necessary for *OmpR*-dependent acid induction of *ompC* and *ompF* [69] suggesting that unlike osmolarity, the *EnvZ* sensor is not required for full expression of the pH-dependent *OmpR* regulon. In *Salmonella*, *ompR* has been shown to be induced by low pH and the induction could be observed at the mRNA as well as the protein level [8]. *ompR* can be transcribed from two promoters, one being used primarily at neutral pH and the other at low pH [7]. Our results with a *ompR-luxCDABE* promoter fusion also show that in *S. typhimurium* expression of *OmpR* responds to increases in osmolarity only to a small extent while it is induced more than tenfold in response to acidification (Rychlik and Gregorova, unpublished). At moderate pH values of around 5.8, phosphorylation of *OmpR* is dependent on *EnvZ* whereas at lower values down to pH 4, phosphorylation becomes dependent mainly on acetyl phosphate [8]. Besides regulation of target genes, the phosphorylated *OmpR* also binds to its own promoter and thus further stimulates its own transcription [7]. Unlike *RpoS* and *Fur* which are important to the adaptation of log phase *Salmonella* cells to changes in external pH, *OmpR* is central to stationary phase-inducible acid tolerance [1]. *ompR* mutants are capable of adapting to low pH in log phase growth but are unable to improve their low pH fitness in stationary phase [8,70].

Interestingly, *OmpR/EnvZ* also regulates both SPI1 and SPI2 encoded genes. SPI1 genes are regulated through the regulator *HilA* [71] and SPI2 genes are regulated through the *SsrAB* regulators [72,73]. Acid shock in the stomach can be translated through *OmpR* into the induction of SPI1 genes essential for the invasion of epithelial cells. pH values approaching 5 inside the *Salmonella* containing vacuole can be translated by *OmpR* into SPI2 induction. Organic acid acidification should

Table 1  
Acid stress response regulators

| Acid stress    | Status of a cell  | Adaptation                       | Central regulator | Role in          |
|----------------|-------------------|----------------------------------|-------------------|------------------|
| Inorganic acid |                   |                                  | PhoPQ             | Virulence        |
| Organic acid   | Stationary phase  |                                  | OmpR              | Virulence        |
|                | Exponential phase | 20 min at pH 5<br>60 min at pH 5 | Fur<br>RpoS       | Stress<br>Stress |
| ?              | ?                 | ?                                | OxrG              | ?                |

Acid induction of *phoPQ* and *ompR* influences also the regulation of *Salmonella* virulence factors.

lead primarily to OmpR activation of *hila* while inorganic acid stress should lead to *ssrAB* activation inside the eucaryotic cell in the nutrient-deprived environment. Thus OmpR/EnvZ, in addition to PhoPQ, seem to convert pH decreases into the regulation of different virulence factors while the primary role of *rpoS* and *fur* appears to be protection against acid stress itself (Table 1).

### 3. *Salmonella* inside the gut

When *Salmonella* leaves the stomach it becomes exposed to several new stresses to which it must respond to survive. It is exposed to multiple external stress factors, including increase in osmotic pressure, which alters folding of proteins present in the outer membrane and periplasm. Outer and cytoplasmic membranes are subjected to the action of bile secreted by the gall bladder into the duodenum. In addition oxygen concentration gradually decreases and enteric pathogens induce anaerobic respiration [74,75]. Inside the small and large intestine, *Salmonella* has to cope increasingly with the presence of other microorganisms, components of the normal microflora. The microflora is able to passively restrict *Salmonella* growth by creating a nutrient-depleted environment, by releasing by-products of their metabolic activities such as propionate or butyrate, which can be harmful to *Salmonella*, or by production of bacteriocins. *Salmonella* is also able to sense the presence of other bacterial species via quorum sensing communication pathways.

#### 3.1. Heat and outer membrane shock

Since the optimal growth temperature for *Salmonella* is 37 °C, the mammalian body temperature probably does not induce the expression of stress regulatory pathways. This may, however, be the case when *Salmonella* infects avian hosts, including chickens, in which the body temperature is nearer 42 °C. When *Salmonella* is exposed to temperatures exceeding 40 °C, heat shock proteins are induced. The promoters of genes coding for the heat shock proteins differ considerably from the sigma 70 promoters and contain the consensus sequence CTTGAAA at position –35 and CCCCAT at

–10 relative to the transcriptional start. Such promoters are recognised by the alternative sigma factor, sigma H, the heat shock-specific sigma subunit of RNA polymerase [76–78]. Heat shock proteins belong to two main classes – chaperones required for folding and/or refolding of misfolded proteins, and proteases which degrade misfolded proteins. The former group includes GroEL/ES, DnaK/DnaJ and Ags chaperones [79–81], the latter group includes proteases such as HtrA or ClpP [82,83]. Despite the different function of chaperones and proteases, both help to maintain protein functionality under stressful conditions. Although these proteins are frequently linked with heat shock, they are in fact essential for protein repair under all stressful conditions. It is not surprising, therefore, that mutants in protein repair are frequently attenuated in virulence for mice, primarily because of their decreased ability to resist the bactericidal agents produced by macrophages [80,84–86].

Heat shock can be understood as a stress inflicted on the bacterial cell from the outside and thus occurring on the outer side of cytoplasmic membrane. Besides sigma H, *Salmonella* encodes another alternative sigma factor, sigma E which is essential for *Salmonella* survival under extra cytoplasmic stress. The origin of such stress can be different, either heat or cold shock [87], activity of antimicrobial peptides [88] or oxidative stress [89]. RpoE is also necessary for the increased stress resistance associated with stationary phase cells [90] and consistent with this, the amount of RpoE increases in stationary phase cell. The signal for this is the presence of misfolded proteins. RpoE is therefore upregulated in *dsbA* or *sodCI* mutants [89] in which greater amount of misfolded proteins are expected. *rpoE* mutants are strongly attenuated for mice, both after per oral and intra-venous application. The level of attenuation is so great that infection with *rpoE* mutants does not even raise a protective immunity against subsequent challenge with the wild-type strain [88].

#### 3.2. Osmotic shock

When *Salmonella* is shifted to an environment under high osmotic pressure, the bacterium aims to increase internal osmotic pressure to maintain cell turgor. This happens by the cytoplasmic accumulation of solutes which are tolerated by the whole cellular machinery.

Potassium is the preferred ion for uptake by the cell [91]. The ionic balance is then balanced by intracellular synthesis of glutamate [92–94]. If the environment is limited in potassium or if the osmotic pressure cannot be regulated by potassium alone, *Salmonella* can increase uptake or biosynthesis of other osmoprotectants such as betaine (*N,N,N*-trimethyl glycine), proline and trehalose [92,95]. In a response to increased osmotic pressure, *Salmonella* can also modify the composition of its outer membrane. This process is sensed by a two-component signal transduction system consisting of EnvZ sensor and OmpR response regulator. As a consequence, in high salt concentration, the OmpF porin is replaced by the OmpC porin which forms outer membrane pores with a smaller diameter thus decreasing the influx of solutes into the periplasm [96,97].

### 3.3. Response to bile

Bile is produced in the liver and consists mainly of bile salts, cholesterol and bilirubin. Due to its strong detergent action against lipids, it also has a strong antimicrobial effect. Little is known about the effects of bile on *Salmonella*. It is thought that lipopolysaccharide (LPS) and active efflux of bile components out of the cell are the primary defense barriers against its action. The importance of LPS has been demonstrated [98,99]. Besides this, only a limited number of genes are known to contribute to bile resistance. This includes *phoP* [100], *tolR* [98] and *wec* [99]. *phoP* is a member of a two-component signal transduction system which is also involved in low pH resistance and resistance to cationic antimicrobial peptides. Resistance to these peptides is mostly dependent on lipid A modification of the outer leaflet of the outer membrane [101], which probably reduces permeability not only to CAMPs but also to components of bile. The *tol* genes encode an outer membrane protein the function of which is to maintain membrane integrity [102,103]. Tol also serves as a receptor for certain phages [104] and as a colicin transport channel [105,106]. The WecA and WecB proteins are responsible for the synthesis of the Enterobacterial common antigen, a glycolipid different from LPS present in the outer membrane. These findings suggest that the main defense of *Salmonella* is based on not allowing bile components to pass through the outer membrane.

A limited amount of bile probably crosses both the outer and cytoplasmic membranes and reaches the cytoplasm. Recently a mutant in *acrAB*, defective in an efflux pump was shown to be sensitive to low concentrations of bile [107] suggesting an alternative defense mechanism against bile. Bile also serves as a signal suppressing the invasion machinery of *Salmonella* [108]. It is expected that such regulation results in *Salmonella* not expressing genes from SPI1 as long as it remains localised in the lumen of the gut. Once *Salmonella* have

efficiently interacted with the mucus layer where bile concentration is expected to be lower, the SPI1-encoded type III secretion system is induced and *Salmonella* becomes capable of invading epithelial cells.

In 1–3% of *Salmonella*-infected human individuals, infection of *Salmonella* serovars Typhi and Paratyphi results in a carrier state. In these cases, one of the most important sites for *Salmonella* survival appears to be the gall bladder. *Salmonella* may colonise the surface of gallstones forming a biofilm resistant to the inhibitory activity of bile. Genes essential for such colonisation include *galE*, *luxS* and those coding for flagella [109,110]. For flagella, it is expected that these allow *Salmonella* to come into contact with the gallstone as well as enabling contact between different *Salmonella* cells forming a biofilm. The function of the other two genes is unknown in this context. Experimental work with *S. Choleraesuis*, which does not generally colonise the chicken gut also showed preferential localisation in the gall bladder in the small number of chickens where establishment had taken place [111].

### 3.4. Switch from aerobiosis to microaerobiosis and anaerobiosis inside the gut

As *Salmonella* passes through the intestine, oxygen availability decreases and in the large intestine the environment is essentially anaerobic although this is less likely to be the case close to the mucosa. *Salmonella* is therefore required to gradually switch from aerobic to a predominantly anaerobic metabolism, rather as a natural response to a gradually changing environment than as a stress response. There are two major regulatory circuits, dependent on Fnr and ArcAB, respectively [112]. ArcAB represents a two-component signal transduction system while Fnr is a cytoplasmic protein reacting to subtle changes of oxygen concentration in the cytoplasm. Although the Fnr and ArcAB regulatory systems can work independently, they frequently operate in a coordinated fashion to control gene expression.

ArcB is an inner membrane sensor protein monitoring changes in the redox status of membrane located quinones [113]. After oxidation of two cysteine residues, ArcB autophosphorylates, transfers the phosphate to ArcA [114] and the activated ArcA-P controls gene transcription. ArcA is most active under microaerobic and anaerobic conditions [26,115] when it suppresses genes encoding enzymes of TCA cycle, probably to decrease respiration under less favourable conditions. This has two consequences, a decrease in the production of harmful oxygen radicals and saving endogenous energy sources [116]. The ArcAB system can also act as a positive regulator by the induction of *cydAB* (cytochrome d oxidase) involved in respiration under oxygen-limiting conditions, and of the *cob* and *pdu* operons important for cobalamin-dependent utilisation of 1,2-propanediol.

In both these cases, ArcAB regulates expression of these target genes in association with Fnr [117–120], although in the case of *pdulcob* the collaborative action of ArcAB and Fnr is indirect. *Salmonella* can synthesise cobalamin de novo generally only under anaerobic conditions and under such conditions, propanediol can be utilised only with tetrathionate as a final electron acceptor in anaerobic respiration. While the *cob/pdu* operons are controlled by ArcAB, the *ttr* operon, which encodes enzymes essential for tetrathionate respiration, is positively regulated by Fnr [120,121]. Propanediol utilisation under anaerobic conditions is therefore dependent on both ArcAB and Fnr.

Fnr, in *Salmonella* also called OxA, is a cytoplasmic sensor of oxygen. It is a Fe–S [4Fe–4S] cluster protein and in the presence of oxygen this cluster is oxidised in two steps into the [2Fe–2S] form [122,123]. Fnr binds at promoter sequences usually at position –41 relative to the start of transcription, although it can also bind at position –61, –71, –81 and –91 depending on the particular promoter structure [124]. The sequence recognised by Fnr is palindromic (TTGATN<sub>4</sub>ATCAA). When bound to this sequence, Fnr interacts with the RpoA subunit of RNA polymerase increasing the efficiency of transcription [125]. In *Salmonella* grown under anaerobic conditions, Fnr positively regulates expression of alternative terminal acceptors [126]. However, besides its role in anaerobic respiration control, Fnr also regulates expression of, amongst other things, the aminotripeptidase *pepT* [127] and one of the major porins in outer membrane, *ompD* [128].

Both ArcAB and Fnr, due to their regulatory activities, regulate production of and defense against reactive oxygen and nitrogen intermediates [116,129,130]. This would suggest that mutants in *arcAB* or *fnr* should show reduced virulence as such reactive species are experienced by *Salmonella* in the *Salmonella*-containing vacuole in eukaryotic cells. However, inactivation of neither *arcAB* nor *fnr* reduces virulence or the ability to colonise the host by *S. typhimurium* suggesting that these proteins and their regulons probably are not highly ex-

pressed in vivo [130,131]. Inactivation of *fnr* in *S. typhi* even increased invasiveness [132].

### 3.5. Interaction with gut microflora

When *Salmonella* colonises the gut, it interacts with the numerically dominant and highly complex microflora. All bacteria produce metabolites which can be inimical to other bacterial species. Such metabolites may be (i) simple metabolic byproducts (e.g., short chain fatty acids), (ii) metabolites produced deliberately to reduce growth of competing bacteria (e.g., colicins produced by *E. coli* and other related bacteria) and (iii) metabolites which modify their own metabolism according to the size of their own population (quorum sensing) or the presence of other bacteria. In addition, the mere presence of gut microflora may result in *Salmonella* experiencing difficulties with nutrient uptake and induction of the stringent response.

#### 3.5.1. Species-specific growth inhibition

It is a matter of debate whether *Salmonella* colonising the gut resembles more closely exponentially growing cells or a culture in a stationary phase. A *Vibrio cholerae* culture inoculated into ligated ileal loops was replicating exponentially for upto 8 h post-inoculation but soon after, the culture appeared to be in stationary phase [75]. Resistance to stresses associated with stationary-phase growth has been largely associated to RpoS-dependent mechanisms [21]. However, stationary-phase growth, defined as the cessation of increase in numbers, can be reached either by insufficient carbon source allocation or due to the lack of electron acceptors [26]. Actually, in nutrient-rich media in vitro, stationary-phase metabolism is usually *rpoS*-independent [133]. Instead, systems involved in nutrient uptake (*tdcC*, *fliM*, *yjhH*, *crp*) and microaerophilic respiration (*nuo* and *cyd* operons, *arcA*, *aroA*, *aroD*) are central to stationary phase as inactivation of either of these genes results in growth non-suppressive (GNS) phenotype [131,133–136]. GNS mutants are unable to suppress multiplication of the wild-type

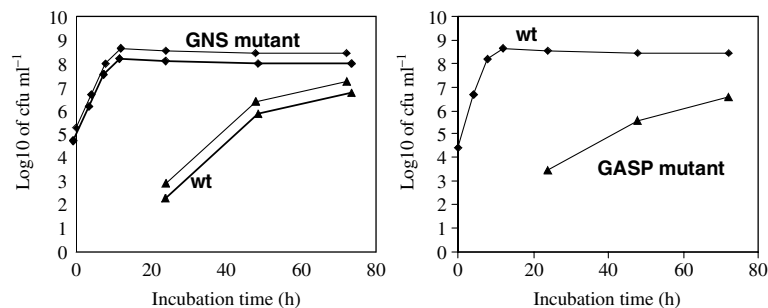

Fig. 2. Growth inhibition in stationary phase cultures of *Salmonella*. GNS (growth non-suppressive) mutants are unable to suppress multiplication of the wild-type strain when this is inoculated in their stationary phase culture (left panel). GASP (growth advantage in stationary phase) mutants are capable of growing through the stationary culture of the wild-type strain.



strains when these are inoculated into the mutant's stationary phase culture (Fig. 2). However, most of the GNS mutants had no effect on the ability to compete with a parental strain in the intestine of newly hatched chickens [131] suggesting that the redox and nutritional conditions in the gut were different and possibly more anaerobic. Therefore, a further completely anaerobic in vitro screen for such mutants was performed which identified a role for *flhA*, *aspA* and *dcuAB* in *S. typhimurium* [137] and *dapF*, *aroD*, *sgaT* or *tatA* in *S. Hadar* [138], most of them related to nutrient uptake or anaerobic respiration. However, even in this case such mutants were fully competitive in vivo (with the exception of *dapF* in *S. Hadar*), suggesting that respiration is likely to be less important in the gut of the newly hatched chicken than substrate-level phosphorylation. A fermentative process is thus likely to be a major contributor to energy balance in the gut, as shown by the total inability of *ackA* and *pta* mutants to colonise (Barrow & Lovell, unpublished results). What therefore is the role of electron transport in the life of *Salmonella* since it is assumed, that little active growth occurs in the environment? Given the non-lactose fermenting nature of the vast majority of *Salmonella* serovars, the original source of these organisms may be reptilian. Since respiration contributes considerably to energy balance in the tissues of the warm blooded animals, it may be that this contributes to *Salmonella* stimulating an active ejection process (gastro-enteritis) after colonisation of the gut of apparently the "wrong" host.

### 3.5.2. Stringent response

When *Salmonella* experiences nutrient depletion intracellular concentrations of ppGpp increase. This metabolite serves as an alarmone and it is one of many factors involved in the expression of *rpoS*. ppGpp is produced by RelA and SpoT. The RelA protein is associated with 1–2% of ribosomes and senses the amounts of discharged tRNAs coming into contact with the ribosome. If the ratio of discharged:charged tRNAs increases, RelA catalyses ppGpp production. The SpoT protein also senses the ratio of charged:discharged tRNAs and as a result of this, produces ppGpp. SpoT is also thought to be involved in ppGpp degradation. When the concentration of ppGpp increases, synthesis of non-coding RNA (e.g., rRNAs and tRNAs) is suppressed and expression of genes coding for enzymes catalysing amino acid biosynthesis is induced [21,139]. ppGpp also stimulates expression of the alternative sigma subunit of RNA polymerase, RpoS [140]. *Salmonella relA spoT* double mutants are highly attenuated for mice [141,142].

### 3.5.3. SCFA

Exposure to short chain fatty acids (SCFA), namely acetate, propionate and butyrate is one of the stresses which *Salmonella* experiences when colonising the intestinal tract. *Salmonella* may experience these acids first in

the crop. Unlike the intestine, the pH in the crop is relatively low (see above), and under these conditions, SCFA may induce acid tolerance [32,143] prior to entry into the gizzard (stomach). In *E. coli*, the genes induced by SCFA overlap with those of the RpoS regulon although induction of *rpoS* itself is not enough for the increased acid resistance observed since *rpoS* induced by osmotic shock by NaCl or sodium acetate did not protect *E. coli* from subsequent exposure to pH 3 [143]. PhoP, another regulatory protein involved in acid tolerance, is not involved in induction of acid tolerance by exposure to SCFA as its deletion can lead to even greater survival in *Salmonella* at low pH, consistent with its role in inorganic acid stress response described above [6].

Individual or mixed SCFA decrease *Salmonella* growth rate in vitro [144]. This effect correlates with the pH of the environment – each SCFA being more effective at pH 5 or 6 than at pH 7 [145]. Individual SCFAs differ in their effects on *Salmonella* invasion of epithelial cell lines. Butyrate suppresses while acetate seems to stimulate invasion of tissue culture cells [146,147]. Acetate, but not propionate or butyrate, was shown to induce *hilA* and *invF* regulators of SPI1 at neutral pH which may explain different invasiveness of *Salmonella* grown in the presence of different SCFAs. These in vitro studies are consistent with the results of experimental infections of birds fed different SCFAs. Feed enriched with acetate resulted in increased *Salmonella* colonisation of the host while butyrate-fed birds were more resistant to intestinal colonisation by *Salmonella*, despite the fact that such treatment did not influence *Salmonella* invasion into deeper tissue such as liver and spleen [148].

### 3.5.4. Bacteriocins

Bacteriocins are peptides of microbial origin which are produced by both gram-positive and gram-negative bacteria, including major components of the gut flora such as *Lactobacillus* sp., *Enterococcus* sp. and *E. coli* [149,150]. Production of bacteriocins by particular microorganisms is frequently linked with their ability to decrease *Salmonella* colonisation of experimental animals [151] although much earlier work tended to suggest that they were unimportant. Production of colicins encoded by the ColV plasmid increases colonisation ability in *E. coli* but this may be related to iron acquisition genes [152–154]. However, essentially nothing is known about *Salmonella* defense against bacteriocins. Overexpression of the *mar* locus, encoding an efficient efflux pump, results in increased resistance to microcin 24 [155]. It may be speculated that, because some of the bacteriocins utilise iron uptake receptors for their transport into a cell [156–158], expression of the Fur regulon in *Salmonella* may produce increased or decrease resistance of *Salmonella* to such bacteriocins. However, whether the presence of sublethal levels of bacteriocins

is sensed and by what mechanisms and whether this results in increased bacteriocin resistance of *Salmonella* similarly to acid tolerance response, or whether such stress is translated into a resistance against other forms of stress or suppression of *Salmonella* virulence factors, is completely unknown.

### 3.5.5. Quorum sensing

Numerous bacterial species have been shown to be able to sense the density of their own population through the production and perception of specific metabolites termed autoinducers. When the autoinducer concentration reaches a threshold, when the bacterial population reaches a certain quorum, specific metabolic pathways are induced. In gram-negative bacteria two main systems are used, utilising either autoinducer 1 (AI-1) or autoinducer 2 (AI-2). AI-1 is an acyl homoserine lactone and is generally species specific. AI-2 based quorum sensing is dependent on the production of a furanone-like compound and is believed to be used for wider interspecies communication as AI-2 activity has been detected in many different bacterial species. The AI-1 dependent system typically consists of a LuxR sensor and regulator, and LuxI, the AI-1 synthase. A key protein for the synthesis of AI-2 is LuxS. Interestingly, *S. typhimurium* harbours in its genome *luxR* and *luxS* homologues but no *luxI* homologue. This suggests that quorum sensing in *Salmonella* may be different from other bacterial species.

**3.5.5.1. Quorum sensing in *Salmonella* and *sdiA*.** In *S. typhimurium* the homologue of *luxR* is *sdiA*. However, there is no obvious homologue of the AI-1 synthase *luxI* in the *S. typhimurium* genome. This, together with sequence analysis, led to the conclusion that *sdiA* was acquired by *E. coli* and *S. typhimurium* by horizontal transfer [159] which may explain some of the unusual properties of *sdiA* described below, mainly its ability to react with autoinducers produced by other bacterial species. Simultaneously, horizontal transfer without the *luxI* homologue would enable separate evolution of *sdiA* resulting in its unique characteristics in *Salmonella*.

The *sdiA* gene was first described in *E. coli* as a suppressor of the division inhibition effect in a *minCD* mutant. Suppression was obtained after overexpression of *sdiA* from a multicopy plasmid leading to overexpression of the *ftsQAZ* locus which resulted in conversion of aberrant filamentous cells back to the typical rod shape [160,161]. In parallel, a search for an *E. coli* autoinducer was made. Surprisingly, there were reports on both SdiA-dependent up- or downregulation of the *ftsQAZ* promoter by spent (conditioned) medium obtained from *E. coli* cultures [161,162]. However, these effects were quite weak and the induction or suppression was never greater than twofold. In *E. coli*, SdiA was also

shown to contribute to virulence gene regulation in enterohaemorrhagic strains of serotype O157:H7 [163]. The same authors also noted that upon overexpression of *sdiA*, motility in 0.25% agar decreased.

Overexpression of *sdiA* in *E. coli* also led to increased resistance to xenobiotics through the activation of the AcrAB multidrug efflux pump [164,165]. Genome-wide microarray analysis in *E. coli* confirmed these observations showing that *sdiA* overexpression leads to increased expression of *ftsQAZ*, *acrAB* and suppressed flagella expression [166].

*sdiA* in *Salmonella* was first described by Ahmer et al. [167] when this group suggested a link between *sdiA* and positive regulation of ten genes on the virulence plasmid including the previously characterised *rck* gene responsible for increased resistance to complement killing and adhesion to epithelial cells [168]. Although *sdiA* in *S. typhimurium* seems to be suppressed by conditioned medium to the extent observed in *E. coli* [169], no AI-1 like metabolite was ever detected also in *S. typhimurium* conditioned media. Ahmer and his colleagues therefore suggested that SdiA may sense autoinducers produced by other bacterial species [170,171]. In parallel to these studies, we showed that a *sdiA* mutant is not defective in stationary phase survival [131] but is of increased virulence for mice [169]. The *fur* box 19 bp upstream from the *sdiA* start codon was also identified and its function in relationship to iron deprivation by dipyrrolyl was shown [169]. Because the Fur protein which binds the *fur* box is also involved in acid resistance [43], we extended our experiments and found that *sdiA* is induced in *S. typhimurium* when the bacterial culture is inoculated in LB at pH 4 under fully aerobic conditions [172]. SdiA in *Salmonella* and *E. coli* may therefore integrate several external stimuli. It can sense sudden reductions in pH. Upon its upregulation, the AcrAB efflux pump is induced [165,166] possibly increasing resistance of *Salmonella* to bile. When acid stress is alleviated after leaving the stomach, induced SdiA may react with autoinducers produced by other bacteria present in the gut and may induce *rck* resulting in increased attachment to epithelial cells. This would be particularly important in the distal parts of the ileum where M cells are concentrated.

**3.5.5.2. Quorum sensing in *Salmonella* and *luxS*.** Numerous gram-positive as well as gram-negative bacteria including *Salmonella* can produce AI-2 [173,174]. *luxS* gene was identified as essential for AI-2 production in *E. coli* and *S. typhimurium* [175]. The highest AI-2 production by *S. typhimurium* is observed in late exponential phase and after entry into stationary phase the AI-2 is degraded. The presence of glucose in nutrient rich media, low pH and high osmolarity stimulates AI-2 production and release from *Salmonella* cells [176,177]. The exact biological function of LuxS and

AI-2 in *Salmonella* is unknown. In *E. coli* and *Shigella* the function of AI-2 has been investigated in greater detail. In *E. coli*, the type III secretion systems encoded by the LEE1 and LEE2 loci are stimulated threefold by the addition of conditioned medium. However, no experimental animal infections were carried out using *E. coli luxS* mutants [178,179]. In *Shigella*, conditioned medium also stimulated virulence-related genes including *virB* but invasion of a *luxS* mutant in tissue culture was unaffected. Similarly, *luxS* mutants of *Shigella* were capable of causing keratoconjunctivitis in the Sereny test in guinea pigs [180].

**3.5.5.3. Biological significance of quorum sensing in Salmonella.** The biological function of quorum sensing in *Salmonella* remains unclear. Initially, it was speculated that quorum sensing may prevent full expression of virulence before the size of the bacterial population becomes high enough to successfully deal with the immune system of the host [181,182]. However, recent findings in *V. cholerae* showed that quorum sensing may act also to downregulate virulence after successful colonisation of the host to decrease continued damage to the host [183]. Interestingly, it has been shown that Hha, a negative regulator of *hilA* in *S. typhimurium* [184], is induced tenfold upon exposure of *E. coli* to conditioned medium containing AI-2 [185]. Since *hilA* is a central regulator of *Salmonella* invasion into the epithelial cells, quorum sensing may act as a negative regulator of virulence also in *Salmonella*. This can be further supported by the observation of slightly increased virulence of *S. typhimurium sdiA* for mice after per oral infection [169].

It is also not clear why LuxI homologues are missing from the *S. typhimurium* genome and whether *luxS* and *sdiA* interact in *Salmonella*. Overlap of AI-1 and AI-2 signalling has been documented in *V. harveyi* in which these two systems co-regulate bioluminescence [186,187]. However, the vast majority of bacterial species utilise exclusively either AI-1 or AI-2 based quorum sensing. Our recent observations show that *sdiA* in *Salmonella* is induced in environments at pH values lower than 5 and such induction was not observed in an *luxS* mutant [172]. Interplay between *sdiA* and *luxS* was described also in *E. coli* [179]. Consistent with our observation, several reports have appeared indicating that, in different bacterial species, *luxS* is induced upon acidification [177,188,189]. Next, quorum-sensing systems have been repeatedly shown to overlap with iron metabolism or uptake [190,191]. It is therefore possible that in *Salmonella* the quorum-sensing machinery, upon horizontal acquisition of the LuxR homologue only [159], evolved into a system for sensing of acidic environments and response to iron although the reasons for and consequences of this are currently unknown but are likely to be associated with

colonisation and virulence. Acid-associated *sdiA* induction is definitively not a question of a mere survival since a *sdiA* deletion mutant survives as well as does the wild-type strain in LB, pH 4, for a week (I. Rychlik, unpublished observations).

### 3.6. Cationic antimicrobial peptides

After *Salmonella* passage through the acid stomach environment and the small intestinal environment rich in bacterial microflora, the microorganisms finally approach epithelial cells which may be protected by antimicrobial agents including cationic antimicrobial peptides (CAMP). CAMP are produced by mammalian, bird, insect and even plant cells in response to microbial infection. In all of these living systems, CAMPs represent a central component of the innate immune system which can protect cells against microbial infection within minutes of contact with infectious agents. CAMP are found on a number of mucosal surfaces including the epithelium of the respiratory and intestinal tracts [192] and are likely to affect colonisation and infection [193]. They are also present in azurophilic granules of neutrophils where they represent the most potent non-oxidative killing mechanism [194]. The production of some of them may be induced upon contact with *Salmonella* [195].

CAMP are peptides 15–50 amino acid long. They are active against both gram-negative and gram-positive bacteria as well as enveloped viruses and some parasites. Structurally they can be classified into four major classes,  $\alpha$ -helical,  $\beta$ -sheet, extended structure and looped [194]. Regardless of their structure they are known to interact with negatively charged lipid membranes. In gram-negative microorganisms they interact with lipid A of LPS on the outer leaflet of the outer membrane. After the initial electrostatic interaction they flip into the lipid bilayer [196]. Once the first molecule of CAMP is inserted into the outer membrane, others interact in a co-operative manner forming channels. Gaining access to the periplasmic space, CAMPs are thought to interact with the cytoplasmic membrane in a similar manner forming channels which results in a decrease of membrane potential, leakage of biologically active chemicals and cell death. This is the most probable mode of action of most of the CAMP although other mechanisms cannot be ruled out as some CAMPs can effectively translocate across artificial membranes [197] and therefore may affect and destroy targets inside bacterial cell. Because of a strong affinity of CAMPs for LPS, killing of bacteria does not result in massive LPS release and therefore pro-inflammatory cytokine responses are not induced, unlike the situation of antibiotic killing [198].

*Salmonella*, as an intestinal and intracellular parasite, has to deal with CAMP action when colonising the host. The *Salmonella* response to CAMP centres on either

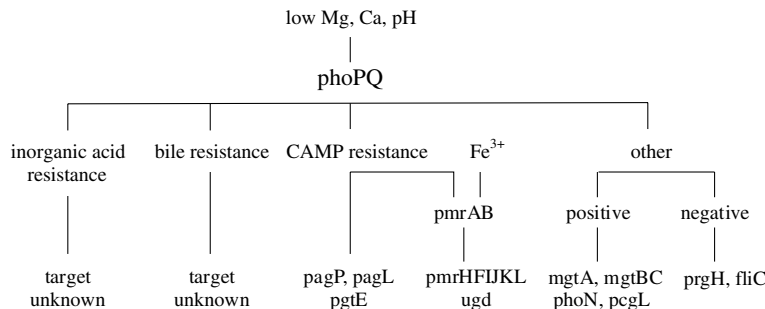

Fig. 3. Role of *phoPQ* in stress response in *S. typhimurium*. PhoPQ regulatory system is most frequently associates with response to  $Mg^{2+}$ . However, it also controls response to inorganic acid pH, and bile and CAMP resistance. In resistance to particular CAMPs, role of PhoPQ is indirect through the regulation of another two-component signal transduction system PmrAB.

modification of the lipid A structure or CAMP cleavage [101]. The most frequent modification of lipid A is its additional palmitoylation due to the activity of PagP [196] or biosynthesis of lipid A with 4-aminoarabinose due to the cooperative activity of the whole *pmrHFIJKL* operon [58,199]. The PgtE protein of *S. typhimurium* can inactivate CAMPs by proteolytic cleavage [200]. *Salmonella* is also capable of 3-*O*-deacylation of lipid A catalysed by PagL, although the biological meaning of this modification is not clear because *pagL* mutants display no obvious phenotype [201]. All of the genes involved in CAMP resistance belong to the *phoPQ* regulon although the *pmrHFIJKL* or *ugd* genes are regulated by PhoPQ indirectly through the PmrAB signal transduction system [58,202,203]. This clearly shows that the PhoPQ regulon is central to *Salmonella* protection against CAMP (Fig. 3) although PhoPQ-independent CAMP resistance has been also described [204]. The PhoPQ regulon is responsible for most of the CAMP resistance including the resistance to defensin, magainin, melittin, mastoparan or cecropin P1 [205]. PmrAB regulates only the 4-aminoarabinose modification of lipid A and therefore is responsible for the resistance to a smaller subset of CAMPs such as polymyxin [199,202]. RpoS is not involved in CAMP resistance although the presence of CAMP is sensed by RpoS but is translated into increased general stress resistance [206] and not into CAMP resistance itself.

Resistance to CAMP can be induced in *Salmonella* by its exposure to formate, succinate or sub-lethal concentrations of CAMP [206,207]. Formate can be produced by competitive microflora in the intestine and therefore contact with formate can increase *Salmonella* resistance to CAMP prior to its contact with CAMP on the surface of epithelium or in the phagolysosome of macrophages. It is no surprise that inability to resist CAMP action leads to *Salmonella* attenuation [205]. It is confusing that CAMPs can suppress SPI1-encoded type III secretion system of *Salmonella* which is necessary for the entry into epithelial cells [206]. This would suggest that CAMP resistance is mainly essential for intracellular

survival of *Salmonella* in macrophages where the SPI1-encoded TTSS is not needed and can be suppressed [64,208]. This is also supported by the central role of the PhoPQ regulon in CAMP resistance as it is well described that PhoP is induced and activated in low pH, low magnesium and low ionic strength environment which is present in macrophage phagolysosomes [63]. However, at least one *Salmonella* mutant sensitive to CAMP action in vitro was attenuated after per oral infection but not after intra peritoneal inoculation [58] which suggests that there may be a differential *Salmonella* response to CAMP produced on the epithelial surfaces and those produced in the phagolysosome of macrophages and neutrophils where *phoPQ* regulon plays a dominant role (see Fig. 3).

#### 4. Concluding remarks

*Salmonella* has evolved several overlapping systems that deal with stress responses, which are of particular relevance during infection of the host (Fig. 4). Despite overlapping, acid resistance operates at the top of all of the adaptations possibly because it is the very first stress which is encountered by *Salmonella* immediately after infection. The central role of acid resistance and stress can be based on the fact that acid adapted cells are resistant to a variety of other stresses such as heat or oxidative stress while heat or oxygen stressed cells are not resistant to low pH. The central role of the acid stress may also explain the results of microarray analysis of *V. cholerae* inoculated directly into ligated rabbit ileal loops. In this study, the stress regulators were not observed among the most expressed genes [75].

*Salmonella* cells infecting the host from the environment are usually not replicating and therefore may resemble stationary phase cells, which are naturally of increased resistance to low pH and as such, these cells are ready for infection. The natural resistance of these cells can be further potentiated by the low pH present

| environment   | stress factor                             | regulons induced                            | result                                                                                                         |
|---------------|-------------------------------------------|---------------------------------------------|----------------------------------------------------------------------------------------------------------------|
| out of host1  | cold, lownutrients                        | <i>rpoS, csp</i>                            | general stress resistance                                                                                      |
| crop          | acid pH, SCFA                             | <i>ompR, rpoS</i>                           | birds only<br>stationary acid tolerance induced ( <i>ompR</i> )<br>SCFA stimulated <i>rpoS</i> acid resistance |
| stomach       | extreme acid pH                           | <i>rpoS, fur, ompR, phoP</i>                | <i>phoP</i> induced, bile resistance induced<br><i>rpoS</i> induced, SCFA resistance induced                   |
| duodenum      | bile                                      | <i>phoP</i>                                 | membrane modifications,<br>invasion suppressed                                                                 |
| ileum         | decreased O <sub>2</sub> supply           | <i>fnr, arcA</i>                            | switch from aerobiosis to anaerobiosis                                                                         |
|               | SCFA                                      | <i>rpoS</i>                                 | acid-induced cross-resistance to SCFA<br>SCFA induce CAMP resistance                                           |
|               | bacteriocins                              | ???                                         | ???                                                                                                            |
|               | competitive flora<br>quorum sensing       | <i>sdiA, luxS</i>                           | virulence regulation, acid stress?                                                                             |
| epithelium    | CAMP                                      | <i>phoP</i>                                 | LPS modifications,<br>resistance to macrophage CAMPs                                                           |
| out of host 2 | cold shock<br>low nutrients<br>aerobiosis | <i>csp, rpoS, arcA, fnr<br/>oxyR, soxRS</i> |                                                                                                                |

flow of infection

Fig. 4. Flow chart of the different stresses experienced by *Salmonella* when colonising susceptible host. Experiencing one form of shock always make *Salmonella* of increased resistance to the stress likely to be encountered during the next step of infection, e.g., acid stress increases *Salmonella* resistance to bile and CAMPs, etc.

in the crop of birds by the induction of the stationary phase acid tolerance response. Additional defense mechanisms are induced after contact with bile and SCFA present in the intestine. These maintain activation of the low pH stress response mechanisms of *Salmonella* and in addition, induce resistance to antimicrobial peptides produced by the host cells. Sensing different adverse stimuli always allows *Salmonella* to adapt to the stress likely to be encountered and thus to successfully colonise the host. Key players in *Salmonella* stress response in intestinal colonisation are RpoS, PhoPQ, Fur or OmpR/EnvZ, which are not specific to this genus, showing that the stress adaptation was already evolved in an ancient ancestor, but whether this was also a gut coloniser is impossible to say. Although regulons of individual stress regulators may have adopted additional functions later in evolution (such as PhoPQ regulon and its role in *Salmonella* virulence), one can imagine that the basic stress resistance is likely to be similar in all microorganisms and with some caution in interpretation, knowledge from the *Salmonella* stress response may perhaps be extrapolated to other microbial species. Finally, these regulators are only partly necessary for *Salmonella* virulence. The role of oxidative stress response is confusing since

mutations in *oxyR* and *soxRS* are not attenuating (Table 2), although mutations in *sodCI* or *sodCII* superoxide dismutases are [209,210]. Other stress responsive pathways such a heat shock contribute to *Salmonella* virulence mainly during its intracellular survival. Stress-related genes which are induced inside macrophages include *htrA* protease and *pgtE*. Moreover, within more than 400 ORFs of unknown function which are upregulated inside macrophage, a number of stress regulators can be expected [211]. Stress response genes are therefore suitable targets for inactivation, either with a purpose of the construction of attenuated *Salmonella* strain to be used for vaccination against salmonellosis itself, or with a purpose of the construction of attenuated carrier strain suitable for the expression of heterologous antigens. For these purposes, inactivation of genes coding for regulators of acid resistance and resistance to CAMPs seems to be the most suitable. This also shows which stress regulons are the most important for gut colonisation. Another group of target genes are those involved in stringent response, outer membrane shock and protein turnover. However, in these it is a question whether the attenuation of such mutants is due to their reduced capacity to colonise the gut or whether this is due to

Table 2

Stress regulators and their relationship to virulence in *Salmonella enterica*: A, attenuated; V, virulent

| Protein   | Function                                  | Virulence of the mutant | Refs.                |
|-----------|-------------------------------------------|-------------------------|----------------------|
| RpoE      | Extracytoplasmic shock                    | A                       | [88]                 |
| RpoH      | Heat shock                                | ?                       |                      |
| HtrA      | Heat shock protease                       | A                       | [84]                 |
| ClpP      | Heat shock protease                       | A                       | [85,86]              |
| DnaK/DnaJ | Heat shock chaperone                      | A                       | [80]                 |
| GroEL/ES  | Heat shock chaperone                      | ?                       |                      |
| RelA/SpoT | Stringent response                        | A                       | [142]                |
| OxyR      | Oxidative and nitrosative stress          | V                       | [212]                |
| SoxRS     | Oxidative and nitrosative stress          | V                       | [213,214]            |
| OmpR/EnvZ | Osmotic shock, acid response              | A                       | [96]                 |
| RpoS      | Acid pH, SCFA resistance                  | A                       | [10,37]              |
| Fur       | Acid pH, oxidative and nitrosative stress | V                       | [50]                 |
| PhoPQ     | Acid pH, bile salts, CAMP                 | A                       | [40,215]             |
| ArcAB     | Anaerobiosis/aerobiosis                   | V                       | [130,131]            |
| Fnr       | Anaerobiosis/aerobiosis                   | V                       | [131,132]            |
| SdiA      | Quorum sensing                            | V                       | [169]                |
| LuxS      | Quorum sensing                            | V                       | Rychlik, unpublished |

a reduced ability of these mutants to survive intracellularly.

## Acknowledgements

I. Rychlik has been supported by projects LN00A016 from the Ministry of Education of the Czech Republic and MZE0002716201 from the Ministry of Agriculture of the Czech Republic. P. Barrow is supported by the Department of the Environment, Food and Rural Affairs, UK Biotechnology and Biological Sciences Research Council, UK and the EU. Some of this work was supported by a grant from the EU (CT98-4006). I. Rychlik acknowledges also an excellent technical assistance of S. Matouskova.

## References

- [1] Lee, I.S., Slonczewski, J.L. and Foster, J.W. (1994) A low-pH-inducible, stationary-phase acid tolerance response in *Salmonella typhimurium*. *J. Bacteriol.* 176, 1422–1426.
- [2] Foster, J.W. (1991) *Salmonella* acid shock proteins are required for the adaptive acid tolerance response. *J. Bacteriol.* 173, 6896–6902.
- [3] Foster, J.W. and Hall, H.K. (1990) Adaptive acidification tolerance response of *Salmonella typhimurium*. *J. Bacteriol.* 172, 771–778.
- [4] Foster, J.W. and Hall, H.K. (1991) Inducible pH homeostasis and the acid tolerance response of *Salmonella typhimurium*. *J. Bacteriol.* 173, 5129–5135.
- [5] Valdivia, R.H. and Falkow, S. (1996) Bacterial genetics by flow cytometry: rapid isolation of *Salmonella typhimurium* acid-inducible promoters by differential fluorescence induction. *Mol. Microbiol.* 22, 367–378.
- [6] Bearson, B.L., Wilson, L. and Foster, J.W. (1998) A low pH-inducible, PhoPQ-dependent acid tolerance response protects *Salmonella typhimurium* against inorganic acid stress. *J. Bacteriol.* 180, 2409–2417.
- [7] Bang, I.S., Audia, J.P., Park, Y.K. and Foster, J.W. (2002) Autoinduction of the *ompR* response regulator by acid shock and control of the *Salmonella enterica* acid tolerance response. *Mol. Microbiol.* 44, 1235–1250.
- [8] Bang, I.S., Kim, B.H., Foster, J.W. and Park, Y.K. (2000) OmpR regulates the stationary-phase acid tolerance response of *Salmonella enterica* serovar *typhimurium*. *J. Bacteriol.* 182, 2245–2252.
- [9] Foster, J.W., Park, Y.K., Bang, I.S., Karem, K., Betts, H., Hall, H.K. and Shaw, E. (1994) Regulatory circuits involved with pH-regulated gene expression in *Salmonella typhimurium*. *Microbiology* 140, 341–352.
- [10] Fang, F.C., Libby, S.J., Buchmeier, N.A., Loewen, P.C., Switala, J., Harwood, J. and Guiney, D.G. (1992) The alternative sigma factor *katF* (*rpoS*) regulates *Salmonella* virulence. *Proc. Natl. Acad. Sci. USA* 89, 11978–11982.
- [11] O'Neal, C.R., Gabriel, W.M., Turk, A.K., Libby, S.J., Fang, F.C. and Spector, M.P. (1994) RpoS is necessary for both the positive and negative regulation of starvation survival genes during phosphate, carbon, and nitrogen starvation in *Salmonella typhimurium*. *J. Bacteriol.* 176, 4610–4616.
- [12] Bearson, S.M., Benjamin Jr., W.H., Swords, W.E. and Foster, J.W. (1996) Acid shock induction of RpoS is mediated by the mouse virulence gene *mviA* of *Salmonella typhimurium*. *J. Bacteriol.* 178, 2572–2579.
- [13] Chen, C.Y., Eckmann, L., Libby, S.J., Fang, F.C., Okamoto, S., Kagnoff, M.F., Fierer, J. and Guiney, D.G. (1996) Expression of *Salmonella typhimurium* *rpoS* and *rpoS*-dependent genes in the intracellular environment of eukaryotic cells. *Infect. Immun.* 64, 4739–4743.
- [14] Lee, I.S., Lin, J., Hall, H.K., Bearson, B. and Foster, J.W. (1995) The stationary-phase sigma factor  $\sigma^S$  (RpoS) is required for a sustained acid tolerance response in virulent *Salmonella typhimurium*. *Mol. Microbiol.* 17, 155–167.
- [15] Chen, C.Y., Buchmeier, N.A., Libby, S., Fang, F.C., Krause, M. and Guiney, D.G. (1995) Central regulatory role for the RpoS sigma factor in expression of *Salmonella* dublin plasmid virulence genes. *J. Bacteriol.* 177, 5303–5309.
- [16] Heiskanen, P., Taira, S. and Rhen, M. (1994) Role of *rpoS* in the regulation of *Salmonella* plasmid virulence (*spv*) genes. *FEMS Microbiol. Lett.* 123, 125–130.

- [17] Kowarz, L., Coynault, C., Robbe-Saule, V. and Norel, F. (1994) The *Salmonella typhimurium katF (rpoS)* gene: cloning, nucleotide sequence, and regulation of *spvR* and *spvABCD* virulence plasmid genes. *J. Bacteriol.* 176, 6852–6860.
- [18] Fang, F.C., Chen, C.Y., Guiney, D.G. and Xu, Y. (1996) Identification of  $\sigma^S$ -regulated genes in *Salmonella typhimurium*: complementary regulatory interactions between sigma S and cyclic AMP receptor protein. *J. Bacteriol.* 178, 5112–5120.
- [19] Ibanez-Ruiz, M., Robbe-Saule, V., Hermant, D., Labrude, S. and Norel, F. (2000) Identification of RpoS ( $\sigma^S$ )-regulated genes in *Salmonella enterica* serovar *typhimurium*. *J. Bacteriol.* 182, 5749–5756.
- [20] Spector, M.P., Garcia, d.P., Bearson, S.M., Mahmud, A., Magut, M., Finlay, B.B., Dougan, G., Foster, J.W. and Pallen, M.J. (1999) The *rpoS*-dependent starvation-stress response locus *stiA* encodes a nitrate reductase (*narZYWV*) required for carbon-starvation-inducible thermotolerance and acid tolerance in *Salmonella typhimurium*. *Microbiology*, 3035–3045.
- [21] Neidhardt, F.C. (Editor in Chief) (1996) *Escherichia coli* and *Salmonella*, 2nd edition. ASM Press, Washington, DC 2005, USA.
- [22] Foster, J.W. (1993) The acid tolerance response of *Salmonella typhimurium* involves transient synthesis of key acid shock proteins. *J. Bacteriol.* 175, 1981–1987.
- [23] Farewell, A., Kvint, K. and Nyström, T. (1998) Negative regulation by RpoS: a case of sigma factor competition. *Mol. Microbiol.* 29, 1039–1051.
- [24] Komitopoulou, E., Bainton, N.J. and Adams, M.R. (2004) Oxidation–reduction potential regulates RpoS levels in *Salmonella typhimurium*. *J. Appl. Microbiol.* 96, 271–278.
- [25] Paesold, G. and Krause, M. (1999) Analysis of *rpoS* mRNA in *Salmonella dublin*: identification of multiple transcripts with growth-phase-dependent variation in transcript stability. *J. Bacteriol.* 181, 1264–1268.
- [26] Sevcik, M., Sebko, A., Volf, J. and Rychlik, I. (2001) Transcription of *arcA* and *rpoS* during growth of *Salmonella typhimurium* under aerobic and microaerobic conditions. *Microbiology* 147, 701–708.
- [27] Lease, R.A. and Belfort, M. (2000) A trans-acting RNA as a control switch in *Escherichia coli*: DsrA modulates function by forming alternative structures. *Proc. Natl. Acad. Sci. USA* 97, 9919–9924.
- [28] Majdalani, N., Chen, S., Murrow, J., St. John, K. and Gottesman, S. (2001) Regulation of RpoS by a novel small RNA: the characterization of RprA. *Mol. Microbiol.* 39, 1382–1394.
- [29] Majdalani, N., Cunniff, C., Sledjeski, D., Elliott, T. and Gottesman, S. (1998) DsrA RNA regulates translation of RpoS message by an anti-antisense mechanism, independent of its action as an antisilencer of transcription. *Proc. Natl. Acad. Sci. USA* 95, 12462–12467.
- [30] Audia, J.P. and Foster, J.W. (2003) Acid shock accumulation of sigma S in *Salmonella enterica* involves increased translation, not regulated degradation. *J. Mol. Microbiol. Biotechnol.* 5, 17–28.
- [31] Baik, H.S., Bearson, S., Dunbar, S. and Foster, J.W. (1996) The acid tolerance response of *Salmonella typhimurium* provides protection against organic acids. *Microbiology* 142, 3195–3200.
- [32] Kwon, Y.M. and Ricke, S.C. (1998) Induction of acid resistance of *Salmonella typhimurium* by exposure to short-chain fatty acids. *Appl. Environ. Microbiol.* 64, 3458–3463.
- [33] El Gedaily, A., Paesold, G., Chen, C.Y., Guiney, D.G. and Krause, M. (1997) Plasmid virulence gene expression induced by short-chain fatty acids in *Salmonella dublin*: identification of *rpoS*-dependent and *rpoS*-independent mechanisms. *J. Bacteriol.* 179, 1409–1412.
- [34] Webb, C., Moreno, M., Wilmes-Riesenberg, M., Curtiss III, R. and Foster, J.W. (1999) Effects of DksA and ClpP protease on sigma S production and virulence in *Salmonella typhimurium*. *Mol. Microbiol.* 34, 112–123.
- [35] Moreno, M., Audia, J.P., Bearson, S.M., Webb, C. and Foster, J.W. (2000) Regulation of sigma S degradation in *Salmonella enterica* var *typhimurium*: in vivo interactions between sigma S, the response regulator MviA(RssB) and ClpX. *J. Mol. Microbiol. Biotechnol.* 2, 245–254.
- [36] Studemann, A., Noirclerc-Savoie, M., Klauck, E., Becker, G., Schneider, D. and Hengge, R. (2003) Sequential recognition of two distinct sites in  $\sigma^S$  by the proteolytic targeting factor RssB and ClpX. *EMBO J.* 22, 4111–4120.
- [37] Coynault, C., Robbe-Saule, V. and Norel, F. (1996) Virulence and vaccine potential of *Salmonella typhimurium* mutants deficient in the expression of the RpoS ( $\sigma^S$ ) regulon. *Mol. Microbiol.* 22, 149–160.
- [38] Nickerson, C.A. and Curtiss III, R. (1997) Role of sigma factor RpoS in initial stages of *Salmonella typhimurium* infection. *Infect. Immun.* 65, 1814–1823.
- [39] Swords, W.E., Giddings, A. and Benjamin Jr., W.H. (1997) Bacterial phenotypes mediated by *mviA* and their relationship to the mouse virulence of *Salmonella typhimurium*. *Microb. Pathog.* 22, 353–362.
- [40] Methner, U., Barrow, P.A., Gregorova, D. and Rychlik, I. (2004) Intestinal colonisation-inhibition and virulence of *Salmonella phoP*, *rpoS* and *ompC* deletion mutants in chickens. *Vet. Microbiol.* 98, 37–43.
- [41] Jorgensen, F., Leach, S., Wilde, S.J., Davies, A., Stewart, G.S. and Humphrey, T. (2000) Invasiveness in chickens, stress resistance and RpoS status of wild-type *Salmonella enterica* subsp. *enterica* serovar *typhimurium* definitive type 104 and serovar *enteritidis* phage type 4 strains. *Microbiology* 146, 3227–3235.
- [42] Tsolis, R.M., Baumber, A.J., Stojiljkovic, I. and Heffron, F. (1995) Fur regulon of *Salmonella typhimurium*: identification of new iron-regulated genes. *J. Bacteriol.* 177, 4628–4637.
- [43] Foster, J.W. and Hall, H.K. (1992) Effect of *Salmonella typhimurium* ferric uptake regulator (*fur*) mutations on iron- and pH-regulated protein synthesis. *J. Bacteriol.* 174, 4317–4323.
- [44] Bijlsma, J.J., Waidner, B., Vliet, A.H., Hughes, N.J., Hag, S., Bereswill, S., Kelly, D.J., Vandenbroucke-Grauls, C.M., Kist, M. and Kusters, J.G. (2002) The *Helicobacter pylori* homologue of the ferric uptake regulator is involved in acid resistance. *Infect. Immun.* 70, 606–611.
- [45] Hall, H.K. and Foster, J.W. (1996) The role of fur in the acid tolerance response of *Salmonella typhimurium* is physiologically and genetically separable from its role in iron acquisition. *J. Bacteriol.* 178, 5683–5691.
- [46] Touati, D., Jacques, M., Tardat, B., Bouchard, L. and Despied, S. (1995) Lethal oxidative damage and mutagenesis are generated by iron in *delta fur* mutants of *Escherichia coli*: protective role of superoxide dismutase. *J. Bacteriol.* 177, 2305–2314.
- [47] Mukhopadhyay, P., Zheng, M., Bedzyk, L.A., LaRossa, R.A. and Storz, G. (2004) Prominent roles of the NorR and Fur regulators in the *Escherichia coli* transcriptional response to reactive nitrogen species. *Proc. Natl. Acad. Sci. USA* 101, 745–750.
- [48] D’Autreaux, B., Touati, D., Bersch, B., Latour, J.M. and Michaud-Soret, I. (2002) Direct inhibition by nitric oxide of the transcriptional ferric uptake regulation protein via nitrosylation of the iron. *Proc. Natl. Acad. Sci. USA* 99, 16619–16624.
- [49] Zheng, M., Doan, B., Schneider, T.D. and Storz, G. (1999) OxyR and SoxRS regulation of *fur*. *J. Bacteriol.* 181, 4639–4643.

- [50] Garcia-Del Portillo, F., Foster, J.W. and Finlay, B.B. (1993) Role of acid tolerance response genes in *Salmonella typhimurium* virulence. *Infect. Immun.* 61, 4489–4492.
- [51] Miller, S.I., Kukral, A.M. and Mekalanos, J.J. (1989) A two-component regulatory system (*phoP phoQ*) controls *Salmonella typhimurium* virulence. *Proc. Natl. Acad. Sci. USA* 86, 5054–5058.
- [52] Groisman, E.A. (2001) The pleiotropic two-component regulatory system PhoP–PhoQ. *J. Bacteriol.* 183, 1835–1842.
- [53] Chamnongpol, S., Cromie, M. and Groisman, E.A. (2003) Mg<sup>2+</sup> sensing by the Mg<sup>2+</sup> sensor PhoQ of *Salmonella enterica*. *J. Mol. Biol.* 325, 795–807.
- [54] Regelmann, A.G., Lesley, J.A., Mott, C., Stokes, L. and Waldburger, C.D. (2002) Mutational analysis of the *Escherichia coli* PhoQ sensor kinase: differences with the *Salmonella enterica* serovar *typhimurium* PhoQ protein and in the mechanism of Mg<sup>2+</sup> and Ca<sup>2+</sup> sensing. *J. Bacteriol.* 184, 5468–5478.
- [55] Adams, P., Fowler, R., Kinsella, N., Howell, G., Farris, M., Coote, P. and O'Connor, C.D. (2001) Proteomic detection of PhoPQ- and acid-mediated repression of *Salmonella* motility. *Proteomics* 1, 597–607.
- [56] Behlau, I. and Miller, S.I. (1993) A PhoP-repressed gene promotes *Salmonella typhimurium* invasion of epithelial cells. *J. Bacteriol.* 175, 4475–4484.
- [57] Pegues, D.A., Hantman, M.J., Behlau, I. and Miller, S.I. (1995) PhoP/PhoQ transcriptional repression of *Salmonella typhimurium* invasion genes: evidence for a role in protein secretion. *Mol. Microbiol.* 17, 169–181.
- [58] Gunn, J.S., Ryan, S.S., Van Velkinburgh, J.C., Ernst, R.K. and Miller, S.I. (2000) Genetic and functional analysis of a PmrA–PmrB-regulated locus necessary for lipopolysaccharide modification, antimicrobial peptide resistance, and oral virulence of *Salmonella enterica* serovar *typhimurium*. *Infect. Immun.* 68, 6139–6146.
- [59] Belden, W.J. and Miller, S.I. (1994) Further characterization of the PhoP regulon: identification of new PhoP-activated virulence loci. *Infect. Immun.* 62, 5095–5101.
- [60] Gunn, J.S., Belden, W.J. and Miller, S.I. (1998) Identification of PhoP–PhoQ activated genes within a duplicated region of the *Salmonella typhimurium* chromosome. *Microb. Pathog.* 25, 77–90.
- [61] Lejona, S., Aguirre, A., Cabeza, M.L., Garcia, V.E. and Soncini, F.C. (2003) Molecular characterization of the Mg<sup>2+</sup>-responsive PhoP–PhoQ regulon in *Salmonella enterica*. *J. Bacteriol.* 185, 6287–6294.
- [62] Soncini, F.C., Garcia, V.E., Solomon, F. and Groisman, E.A. (1996) Molecular basis of the magnesium deprivation response in *Salmonella typhimurium*: identification of PhoP-regulated genes. *J. Bacteriol.* 178, 5092–5099.
- [63] Groisman, E.A., Kayser, J. and Soncini, F.C. (1997) Regulation of polymyxin resistance and adaptation to low-Mg<sup>2+</sup> environments. *J. Bacteriol.* 179, 7040–7045.
- [64] Deiwick, J., Nikolaus, T., Erdogan, S. and Hensel, M. (1999) Environmental regulation of *Salmonella* pathogenicity island 2 gene expression. *Mol. Microbiol.* 31, 1759–1773.
- [65] Beuzon, C.R., Unsworth, K.E. and Holden, D.W. (2001) In vivo genetic analysis indicates that PhoP–PhoQ and the *Salmonella* pathogenicity island 2 type III secretion system contribute independently to *Salmonella enterica* serovar *typhimurium* virulence. *Infect. Immun.* 69, 7254–7261.
- [66] Alpuche Aranda, C.M., Swanson, J.A., Loomis, W.P. and Miller, S.I. (1992) *Salmonella typhimurium* activates virulence gene transcription within acidified macrophage phagosomes. *Proc. Natl. Acad. Sci. USA* 89, 10079–10083.
- [67] Taylor, R.K., Hall, M.N., Enquist, L. and Silhavy, T.J. (1981) Identification of OmpR: a positive regulatory protein controlling expression of the major outer membrane matrix porin proteins of *Escherichia coli* K-12. *J. Bacteriol.* 147, 255–258.
- [68] Hsing, W. and Silhavy, T.J. (1997) Function of conserved histidine-243 in phosphatase activity of EnvZ, the sensor for porin osmoregulation in *Escherichia coli*. *J. Bacteriol.* 179, 3729–3735.
- [69] Sato, M., Machida, K., Arikado, E., Saito, H., Kakegawa, T. and Kobayashi, H. (2000) Expression of outer membrane proteins in *Escherichia coli* growing at acid pH. *Appl. Environ. Microbiol.* 66, 943–947.
- [70] Audia, J.P., Webb, C.C. and Foster, J.W. (2001) Breaking through the acid barrier: an orchestrated response to proton stress by enteric bacteria. *Int. J. Med. Microbiol.* 291, 97–106.
- [71] Lucas, R.L., Lostroh, C.P., DiRusso, C.C., Spector, M.P., Wanner, B.L. and Lee, C.A. (2000) Multiple factors independently regulate *hilA* and invasion gene expression in *Salmonella enterica* serovar *typhimurium*. *J. Bacteriol.* 182, 1872–1882.
- [72] Feng, X., Oropeza, R. and Kenney, L.J. (2003) Dual regulation by phospho-OmpR of *ssrA/B* gene expression in *Salmonella* pathogenicity island 2. *Mol. Microbiol.* 48, 1131–1143.
- [73] Lee, A.K., Detweiler, C.S. and Falkow, S. (2000) OmpR regulates the two-component system SsrA–ssrB in *Salmonella* pathogenicity island 2. *J. Bacteriol.* 182, 771–781.
- [74] Merrell, D.S., Butler, S.M., Qadri, F., Dolganov, N.A., Alam, A., Cohen, M.B., Calderwood, S.B., Schoolnik, G.K. and Camilli, A. (2002) Host-induced epidemic spread of the cholera bacterium. *Nature* 417, 642–645.
- [75] Xu, Q., Dziejman, M. and Mekalanos, J.J. (2003) Determination of the transcriptome of *Vibrio cholerae* during intrainestinal growth and midexponential phase in vitro. *Proc. Natl. Acad. Sci. USA* 100, 1286–1291.
- [76] Jenkins, D.E., Auger, E.A. and Matin, A. (1991) Role of RpoH, a heat shock regulator protein, in *Escherichia coli* carbon starvation protein synthesis and survival. *J. Bacteriol.* 173, 1992–1996.
- [77] Wang, Q.P. and Kaguni, J.M. (1989) A novel sigma factor is involved in expression of the *rpoH* gene of *Escherichia coli*. *J. Bacteriol.* 171, 4248–4253.
- [78] Wang, Q.P. and Kaguni, J.M. (1989) *dnaA* protein regulates transcriptions of the *rpoH* gene of *Escherichia coli*. *J. Biol. Chem.* 264, 7338–7344.
- [79] Peralta, D., Hartman, D.J., Hoogenraad, N.J. and Hoj, P.B. (1994) Generation of a stable folding intermediate which can be rescued by the chaperonins GroEL and GroES. *FEBS Lett.* 339, 45–49.
- [80] Takaya, A., Tomoyasu, T., Matsui, H. and Yamamoto, T. (2004) The DnaK/DnaJ chaperone machinery of *Salmonella enterica* serovar *typhimurium* is essential for invasion of epithelial cells and survival within macrophages, leading to systemic infection. *Infect. Immun.* 72, 1364–1373.
- [81] Tomoyasu, T., Takaya, A., Sasaki, T., Nagase, T., Kikuno, R., Morioka, M. and Yamamoto, T. (2003) A new heat shock gene, *AgsA*, which encodes a small chaperone involved in suppressing protein aggregation in *Salmonella enterica* serovar *typhimurium*. *J. Bacteriol.* 185, 6331–6339.
- [82] Pallen, M.J. and Wren, B.W. (1997) The HtrA family of serine proteases. *Mol. Microbiol.* 26, 209–221.
- [83] Thomsen, L.E., Olsen, J.E., Foster, J.W. and Ingmer, H. (2002) ClpP is involved in the stress response and degradation of misfolded proteins in *Salmonella enterica* serovar *typhimurium*. *Microbiology* 148, 2727–2733.
- [84] Chatfield, S.N., Strahan, K., Pickard, D., Charles, I.G., Hormaeche, C.E. and Dougan, G. (1992) Evaluation of *Salmonella typhimurium* strains harbouring defined mutations in *htrA* and *aroA* in the murine salmonellosis model. *Microb. Pathog.* 12, 145–151.



- [85] Matsui, H., Suzuki, M., Isshiki, Y., Kodama, C., Eguchi, M., Kikuchi, Y., Motokawa, K., Takaya, A., Tomoyasu, T. and Yamamoto, T. (2003) Oral immunization with ATP-dependent protease-deficient mutants protects mice against subsequent oral challenge with virulent *Salmonella enterica* serovar *typhimurium*. *Infect. Immun.* 71, 30–39.
- [86] Yamamoto, T., Sashinami, H., Takaya, A., Tomoyasu, T., Matsui, H., Kikuchi, Y., Hanawa, T., Kamiya, S. and Nakane, A. (2001) Disruption of the genes for ClpXP protease in *Salmonella enterica* serovar *typhimurium* results in persistent infection in mice, and development of persistence requires endogenous gamma interferon and tumor necrosis factor alpha. *Infect. Immun.* 69, 3164–3174.
- [87] Miticka, H., Rowley, G., Rezuchova, B., Homerova, D., Humphreys, S., Farn, J., Roberts, M. and Kormanec, J. (2003) Transcriptional analysis of the *rpoE* gene encoding extracytoplasmic stress response sigma factor  $\sigma^E$  in *Salmonella enterica* serovar *typhimurium*. *FEMS Microbiol. Lett.* 226, 307–314.
- [88] Humphreys, S., Stevenson, A., Bacon, A., Weinhardt, A.B. and Roberts, M. (1999) The alternative sigma factor,  $\sigma^E$ , is critically important for the virulence of *Salmonella typhimurium*. *Infect. Immun.* 67, 1560–1568.
- [89] Testerman, T.L., Vazquez-Torres, A., Xu, Y., Jones-Carson, J., Libby, S.J. and Fang, F.C. (2002) The alternative sigma factor  $\sigma^E$  controls antioxidant defences required for *Salmonella* virulence and stationary-phase survival. *Mol. Microbiol.* 43, 771–782.
- [90] Kenyon, W.J., Sayers, D.G., Humphreys, S., Roberts, M. and Spector, M.P. (2002) The starvation-stress response of *Salmonella enterica* serovar *typhimurium* requires  $\sigma^E$ , but not CpxR-regulated extracytoplasmic functions. *Microbiology* 148, 113–122.
- [91] Sutherland, L., Cairney, J., Elmore, M.J., Booth, I.R. and Higgins, C.F. (1986) Osmotic regulation of transcription: induction of the *proU* betaine transport gene is dependent on accumulation of intracellular potassium. *J. Bacteriol.* 168, 805–814.
- [92] Csonka, L.N. (1988) Regulation of cytoplasmic proline levels in *Salmonella typhimurium*: effect of osmotic stress on synthesis, degradation, and cellular retention of proline. *J. Bacteriol.* 170, 2374–2378.
- [93] Csonka, L.N., Ikeda, T.P., Fletcher, S.A. and Kustu, S. (1994) The accumulation of glutamate is necessary for optimal growth of *Salmonella typhimurium* in media of high osmolality but not induction of the *proU* operon. *J. Bacteriol.* 176, 6324–6333.
- [94] Yan, D., Ikeda, T.P., Shauger, A.E. and Kustu, S. (1996) Glutamate is required to maintain the steady-state potassium pool in *Salmonella typhimurium*. *Proc. Natl. Acad. Sci. USA* 93, 6527–6531.
- [95] Howells, A.M., Bullifent, H.L., Dhaliwal, K., Griffin, K., Garcia, d.C., Frith, G., Tunnaclyffe, A. and Titball, R.W. (2002) Role of trehalose biosynthesis in environmental survival and virulence of *Salmonella enterica* serovar *typhimurium*. *Res. Microbiol.* 153, 281–287.
- [96] Chatfield, S.N., Dorman, C.J., Hayward, C. and Dougan, G. (1991) Role of *ompR*-dependent genes in *Salmonella typhimurium* virulence: mutants deficient in both *ompC* and *ompF* are attenuated in vivo. *Infect. Immun.* 59, 449–452.
- [97] Graeme-Cook, K.A., May, G., Bremer, E. and Higgins, C.F. (1989) Osmotic regulation of porin expression: a role for DNA supercoiling. *Mol. Microbiol.* 3, 1287–1294.
- [98] Prouty, A.M., Van Velkinburgh, J.C. and Gunn, J.S. (2002) *Salmonella enterica* serovar *typhimurium* resistance to bile: identification and characterization of the *tolQRA* cluster. *J. Bacteriol.* 184, 1270–1276.
- [99] Ramos-Morales, F., Prieto, A.I., Beuzon, C.R., Holden, D.W. and Casadesus, J. (2003) Role for *Salmonella enterica* enterobacterial common antigen in bile resistance and virulence. *J. Bacteriol.* 185, 5328–5332.
- [100] Van Velkinburgh, J.C. and Gunn, J.S. (1999) PhoP–PhoQ-regulated loci are required for enhanced bile resistance in *Salmonella* spp. *Infect. Immun.* 67, 1614–1622.
- [101] Guo, L., Lim, K.B., Gunn, J.S., Bainbridge, B., Darveau, R.P., Hackett, M. and Miller, S.I. (1997) Regulation of lipid A modifications by *Salmonella typhimurium* virulence genes *phoP*–*phoQ*. *Science* 276, 250–253.
- [102] Chai, T.J. and Foulds, J. (1977) *Escherichia coli* K-12 *tolF* mutants: alterations in protein composition of the outer membrane. *J. Bacteriol.* 130, 781–786.
- [103] Foulds, J. and Chai, T.J. (1978) New major outer membrane proteins found in an *Escherichia coli tolF* mutant resistant to bacteriophage Tu1b. *J. Bacteriol.* 133, 1478–1483.
- [104] Heilpern, A.J. and Waldor, M.K. (2000) CTXphi infection of *Vibrio cholerae* requires the *tolQRA* gene products. *J. Bacteriol.* 182, 1739–1747.
- [105] Lazzaroni, J.C., Germon, P., Ray, M.C. and Vianney, A. (1999) The Tol proteins of *Escherichia coli* and their involvement in the uptake of biomolecules and outer membrane stability. *FEMS Microbiol. Lett.* 177, 191–197.
- [106] Levensgood, S.K., Beyer Jr., W.F. and Webster, R.E. (1991) TolA: a membrane protein involved in colicin uptake contains an extended helical region. *Proc. Natl. Acad. Sci. USA* 88, 5939–5943.
- [107] Prouty, A.M., Brodsky, I.E., Falkow, S. and Gunn, J.S. (2004) Bile-salt-mediated induction of antimicrobial and bile resistance in *Salmonella typhimurium*. *Microbiology* 150, 775–783.
- [108] Prouty, A.M. and Gunn, J.S. (2000) *Salmonella enterica* serovar *typhimurium* invasion is repressed in the presence of bile. *Infect. Immun.* 68, 6763–6769.
- [109] Prouty, A.M. and Gunn, J.S. (2003) Comparative analysis of *Salmonella enterica* serovar *typhimurium* biofilm formation on gallstones and on glass. *Infect. Immun.* 71, 7154–7158.
- [110] Prouty, A.M., Schwesinger, W.H. and Gunn, J.S. (2002) Biofilm formation and interaction with the surfaces of gallstones by *Salmonella* spp. *Infect. Immun.* 70, 2640–2649.
- [111] Barrow, P.A. (1989) Further observations on the effect of feeding diets containing avoparcin on the excretion of Salmonellas by experimentally infected chickens. *Epidemiol. Infect.* 102, 239–252.
- [112] Unden, G., Becker, S., Bongaerts, J., Holighaus, G., Schirawski, J. and Six, S. (1995) O<sub>2</sub>-sensing and O<sub>2</sub>-dependent gene regulation in facultatively anaerobic bacteria. *Arch. Microbiol.* 164, 81–90.
- [113] Georgellis, D., Kwon, O. and Lin, E.C. (2001) Quinones as the redox signal for the *arc* two-component system of bacteria. *Science* 292, 2314–2316.
- [114] Malpica, R., Franco, B., Rodriguez, C., Kwon, O. and Georgellis, D. (2004) Identification of a quinone-sensitive redox switch in the ArcB sensor kinase. *Proc. Natl. Acad. Sci. USA* 101, 13318–13323.
- [115] Alexeeva, S., Hellingwerf, K.J. and Teixeira de Mattos, M.J. (2003) Requirement of ArcA for redox regulation in *Escherichia coli* under microaerobic but not anaerobic or aerobic conditions. *J. Bacteriol.* 185, 204–209.
- [116] Nystrom, T., Larsson, C. and Gustafsson, L. (1996) Bacterial defense against aging: role of the *Escherichia coli* ArcA regulator in gene expression, readjusted energy flux and survival during stasis. *EMBO J.* 15, 3219–3228.
- [117] Ailion, M., Bobik, T.A. and Roth, J.R. (1993) Two global regulatory systems (Crp and Arc) control the cobalamin/

- propanediol regulon of *Salmonella typhimurium*. J. Bacteriol. 175, 7200–7208.
- [118] Chen, P., Andersson, D.I. and Roth, J.R. (1994) The control region of the *pdulcob* regulon in *Salmonella typhimurium*. J. Bacteriol. 176, 5474–5482.
- [119] Govantes, F., Orjalo, A.V. and Gunsalus, R.P. (2000) Interplay between three global regulatory proteins mediates oxygen regulation of the *Escherichia coli* cytochrome d oxidase (*cydAB*) operon. Mol. Microbiol. 38, 1061–1073.
- [120] Price-Carter, M., Tingey, J., Bobik, T.A. and Roth, J.R. (2001) The alternative electron acceptor tetrathionate supports B12-dependent anaerobic growth of *Salmonella enterica* serovar *typhimurium* on ethanalamine or 1,2-propanediol. J. Bacteriol. 183, 2463–2475.
- [121] Hensel, M., Hinsley, A.P., Nikolaus, T., Sawers, G. and Berks, B.C. (1999) The genetic basis of tetrathionate respiration in *Salmonella typhimurium*. Mol. Microbiol. 32, 275–287.
- [122] Crack, J., Green, J. and Thomson, A.J. (2004) Mechanism of oxygen sensing by the bacterial transcription factor fumarate–nitrate reduction. J. Biol. Chem. 279, 9278–9286.
- [123] Khoroshilova, N., Popescu, C., Munck, E., Beinert, H. and Kiley, P.J. (1997) Iron–sulfur cluster disassembly in the FNR protein of *Escherichia coli* by O<sub>2</sub>: [4Fe–4S] to [2Fe–2S] conversion with loss of biological activity. Proc. Natl. Acad. Sci. USA 94, 6087–6092.
- [124] Wing, H.J., Williams, S.M. and Busby, S.J. (1995) Spacing requirements for transcription activation by *Escherichia coli* FNR protein. J. Bacteriol. 177, 6704–6710.
- [125] Lombardo, M.J., Bagga, D. and Miller, C.G. (1991) Mutations in *rpoA* affect expression of anaerobically regulated genes in *Salmonella typhimurium*. J. Bacteriol. 173, 7511–7518.
- [126] Wei, Y. and Miller, C.G. (1999) Characterization of a group of anaerobically induced, *fnr*-dependent genes of *Salmonella typhimurium*. J. Bacteriol. 181, 6092–6097.
- [127] Lombardo, M.J., Lee, A.A., Knox, T.M. and Miller, C.G. (1997) Regulation of the *Salmonella typhimurium pepT* gene by cyclic AMP receptor protein (CRP) and FNR acting at a hybrid CRP–FNR site. J. Bacteriol. 179, 1909–1917.
- [128] Santiviago, C.A., Toro, C.S., Hidalgo, A.A., Youderian, P. and Mora, G.C. (2003) Global regulation of the *Salmonella enterica* serovar *typhimurium* major porin, OmpD. J. Bacteriol. 185, 5901–5905.
- [129] Kim, C.C., Monack, D. and Falkow, S. (2003) Modulation of virulence by two acidified nitrite-responsive loci of *Salmonella enterica* serovar *typhimurium*. Infect. Immun. 71, 3196–3205.
- [130] Lu, S., Killoran, P.B., Fang, F.C. and Riley, L.W. (2002) The global regulator ArcA controls resistance to reactive nitrogen and oxygen intermediates in *Salmonella enterica* serovar *enteritidis*. Infect. Immun. 70, 451–461.
- [131] Rychlik, I., Martin, G., Methner, U., Lovell, M., Cardova, L., Sebkova, A., Sevcik, M., Damborsky, J. and Barrow, P.A. (2002) Identification of *Salmonella enterica* serovar *typhimurium* genes associated with growth suppression in stationary-phase nutrient broth cultures and in the chicken intestine. Arch. Microbiol. 178, 411–420.
- [132] Contreras, I., Toro, C.S., Troncoso, G. and Mora, G.C. (1997) *Salmonella typhi* mutants defective in anaerobic respiration are impaired in their ability to replicate within epithelial cells. Microbiology 143, 2665–2672.
- [133] Barrow, P.A., Lovell, M.A. and Barber, L.Z. (1996) Growth suppression in early-stationary-phase nutrient broth cultures of *Salmonella typhimurium* and *Escherichia coli* is genus specific and not regulated by  $\sigma^S$ . J. Bacteriol. 178, 3072–3076.
- [134] Zambrano, M.M. and Kolter, R. (1993) *Escherichia coli* mutants lacking NADH dehydrogenase I have a competitive disadvantage in stationary phase. J. Bacteriol. 175, 5642–5647.
- [135] Zambrano, M.M., Siegele, D.A., Almiron, M., Tormo, A. and Kolter, R. (1993) Microbial competition: *Escherichia coli* mutants that take over stationary phase cultures. Science 259, 1757–1760.
- [136] Zinser, E.R. and Kolter, R. (1999) Mutations enhancing amino acid catabolism confer a growth advantage in stationary phase. J. Bacteriol. 181, 5800–5807.
- [137] Nogrady, N., Imre, A., Rychlik, I., Barrow, P.A. and Nagy, B. (2003) Genes responsible for anaerobic fumarate and arginine metabolism are involved in growth suppression in *Salmonella enterica* serovar *typhimurium* in vitro, without influencing colonisation inhibition in the chicken in vivo. Vet. Microbiol. 97, 191–199.
- [138] Nogrady, N., Imre, A., Rychlik, I., Barrow, P.A. and Nagy, B. (2003) Growth and colonization suppression of *Salmonella enterica* serovar Hadar in vitro and in vivo. FEMS Microbiol. Lett. 218, 127–133.
- [139] Tedin, K. and Norel, F. (2001) Comparison of  $\Delta relA$  strains of *Escherichia coli* and *Salmonella enterica* serovar *typhimurium* suggests a role for ppGpp in attenuation regulation of branched-chain amino acid biosynthesis. J. Bacteriol. 183, 6184–6196.
- [140] Gentry, D.R., Hernandez, V.J., Nguyen, L.H., Jensen, D.B. and Cashel, M. (1993) Synthesis of the stationary-phase sigma factor  $\sigma^S$  is positively regulated by ppGpp. J. Bacteriol. 175, 7982–7989.
- [141] Pizarro-Cerda, J. and Tedin, K. (2004) The bacterial signal molecule, ppGpp, regulates *Salmonella* virulence gene expression. Mol. Microbiol. 52, 1827–1844.
- [142] Song, M., Kim, H.J., Kim, E.Y., Shin, M., Lee, H.C., Hong, Y., Rhee, J.H., Yoon, H., Ryu, S., Lim, S. and Choy, H.E. (2004) ppGpp-dependent stationary phase induction of genes on *Salmonella* pathogenicity island 1. J. Biol. Chem. 279, 34183–34190.
- [143] Arnold, C.N., McElhanon, J., Lee, A., Leonhart, R. and Siegele, D.A. (2001) Global analysis of *Escherichia coli* gene expression during the acetate-induced acid tolerance response. J. Bacteriol. 183, 2178–2186.
- [144] McHan, F. and Shotts, E.B. (1993) Effect of short-chain fatty acids on the growth of *Salmonella typhimurium* in an in vitro system. Avian Dis. 37, 396–398.
- [145] Durant, J.A., Lowry, V.K., Nisbet, D.J., Stanker, L.H., Corrier, D.E. and Ricke, S.C. (1999) Short-chain fatty acids affect cell-association and invasion of HEp-2 cells by *Salmonella typhimurium*. J. Environ. Sci. Health B 34, 1083–1099.
- [146] Lawhon, S.D., Maurer, R., Suyemoto, M. and Altier, C. (2002) Intestinal short-chain fatty acids alter *Salmonella typhimurium* invasion gene expression and virulence through BarA/SirA. Mol. Microbiol. 46, 1451–1464.
- [147] Van Immerseel, F., De Buck, J., Pasmans, F., Velge, P., Bottreau, E., Fievez, V., Haesebrouck, F. and Ducatelle, R. (2003) Invasion of *Salmonella enteritidis* in avian intestinal epithelial cells in vitro is influenced by short-chain fatty acids. Int. J. Food Microbiol. 85, 237–248.
- [148] Van Immerseel, F., Fievez, V., De Buck, J., Pasmans, F., Martel, A., Haesebrouck, F. and Ducatelle, R. (2004) Microencapsulated short-chain fatty acids in feed modify colonization and invasion early after infection with *Salmonella enteritidis* in young chickens. Poult. Sci. 83, 69–74.
- [149] Choi, H.J., Cheigh, C.I., Kim, S.B. and Pyun, Y.R. (2000) Production of a nisin-like bacteriocin by *Lactococcus lactis* subsp. *lactis* A164 isolated from Kimchi. J. Appl. Microbiol. 88, 563–571.
- [150] Portrait, V., Gendron-Gaillard, S., Cottenceau, G. and Pons, A.M. (1999) Inhibition of pathogenic *Salmonella enteritidis* growth mediated by *Escherichia coli* microcin J25 producing strains. Can. J. Microbiol. 45, 988–994.

- [151] Audisio, M.C., Oliver, G. and Apella, M.C. (1999) Antagonistic effect of *Enterococcus faecium* J96 against human and poultry pathogenic *Salmonella* spp. *J. Food Prot.* 62, 751–755.
- [152] Smith, H.W. and Huggins, M.B. (1976) Further observations on the association of the colicine V plasmid of *Escherichia coli* with pathogenicity and with survival in the alimentary tract. *J. Gen. Microbiol.* 92, 335–350.
- [153] Smith, H.W. and Huggins, M.B. (1977) Treatment of experimental *Escherichia coli* infection in mice with colicine V. *J. Med. Microbiol.* 10, 479–482.
- [154] Smith, I.M., Hill, R. and Brothwell, E. (1980) The effects of added dietary iron in various forms on mice inoculated with *Salmonella typhimurium*. *Res. Vet. Sci.* 28, 161–167.
- [155] Carlson, S.A., Frana, T.S. and Griffith, R.W. (2001) Antibiotic resistance in *Salmonella enterica* serovar *typhimurium* exposed to microcin-producing *Escherichia coli*. *Appl. Environ. Microbiol.* 67, 3763–3766.
- [156] Destoumieux-Garzon, D., Thomas, X., Santamaria, M., Goulard, C., Barthelemy, M., Boscher, B., Bessin, Y., Molle, G., Pons, A.M., Letellier, L., Peduzzi, J. and Rebuffat, S. (2003) Microcin E492 antibacterial activity: evidence for a TonB-dependent inner membrane permeabilization on *Escherichia coli*. *Mol. Microbiol.* 49, 1031–1041.
- [157] Patzer, S.I., Baquero, M.R., Bravo, D., Moreno, F. and Hantke, K. (2003) The colicin G, H and X determinants encode microcins M and H47, which might utilize the catechol siderophore receptors FepA, Cir, Fiu and IroN. *Microbiology* 149, 2557–2570.
- [158] Vincent, P.A., Delgado, M.A., Farias, R.N. and Salomon, R.A. (2004) Inhibition of *Salmonella enterica* serovars by microcin J25. *FEMS Microbiol. Lett.* 236, 103–107.
- [159] Gray, K.M. and Garey, J.R. (2001) The evolution of bacterial LuxI and LuxR quorum sensing regulators. *Microbiology* 147, 2379–2387.
- [160] Wang, X.D., de Boer, P.A. and Rothfield, L.I. (1991) A factor that positively regulates cell division by activating transcription of the major cluster of essential cell division genes of *Escherichia coli*. *EMBO J.* 10, 3363–3372.
- [161] Sitnikov, D.M., Schineller, J.B. and Baldwin, T.O. (1996) Control of cell division in *Escherichia coli*: regulation of transcription of *ftsQA* involves both *rpoS* and SdiA-mediated autoinduction. *Proc. Natl. Acad. Sci. USA* 93, 336–341.
- [162] Garcia-Lara, J., Shang, L.H. and Rothfield, L.I. (1996) An extracellular factor regulates expression of *sdiA*, a transcriptional activator of cell division genes in *Escherichia coli*. *J. Bacteriol.* 178, 2742–2748.
- [163] Kanamaru, K., Kanamaru, K., Tatsuno, I., Tobe, T. and Sasakawa, C. (2000) SdiA, an *Escherichia coli* homologue of quorum-sensing regulators, controls the expression of virulence factors in enterohaemorrhagic *Escherichia coli* O157:H7. *Mol. Microbiol.* 38, 805–816.
- [164] Rahmati, S., Yang, S., Davidson, A.L. and Zechiedrich, E.L. (2002) Control of the AcrAB multidrug efflux pump by quorum-sensing regulator SdiA. *Mol. Microbiol.* 43, 677–685.
- [165] Wei, Y., Vollmer, A.C. and LaRossa, R.A. (2001) In vivo titration of mitomycin C action by four *Escherichia coli* genomic regions on multicopy plasmids. *J. Bacteriol.* 183, 2259–2264.
- [166] Wei, Y., Lee, J.M., Smulski, D.R. and LaRossa, R.A. (2001) Global impact of *sdiA* amplification revealed by comprehensive gene expression profiling of *Escherichia coli*. *J. Bacteriol.* 183, 2265–2272.
- [167] Ahmer, B.M., van Reeuwijk, J., Timmers, C.D., Valentine, P.J. and Heffron, F. (1998) *Salmonella typhimurium* encodes an SdiA homolog, a putative quorum sensor of the LuxR family, that regulates genes on the virulence plasmid. *J. Bacteriol.* 180, 1185–1193.
- [168] Cirillo, D.M., Heffernan, E.J., Wu, L., Harwood, J., Fierer, J. and Guiney, D.G. (1996) Identification of a domain in Rck, a product of the *Salmonella typhimurium* virulence plasmid, required for both serum resistance and cell invasion. *Infect. Immun.* 64, 2019–2023.
- [169] Volf, J., Sevcik, M., Havlickova, H., Sisak, F., Damborsky, J. and Rychlik, I. (2002) Role of SdiA in *Salmonella enterica* serovar *typhimurium* physiology and virulence. *Arch. Microbiol.* 178, 94–101.
- [170] Michael, B., Smith, J.N., Swift, S., Heffron, F. and Ahmer, B.M. (2001) SdiA of *Salmonella enterica* is a LuxR homolog that detects mixed microbial communities. *J. Bacteriol.* 183, 5733–5742.
- [171] Smith, J.N. and Ahmer, B.M. (2003) Detection of other microbial species by *Salmonella*: expression of the SdiA regulon. *J. Bacteriol.* 185, 1357–1366.
- [172] Rychlik, I. and Gregorova, D. (2004) *sdiA* in *Salmonella enterica* serovar *typhimurium* is induced at low pH. *ASM Conference on Cell–Cell Communication in Bacteria*, Banff, Canada, pp. 32–33.
- [173] Bassler, B.L., Greenberg, E.P. and Stevens, A.M. (1997) Cross-species induction of luminescence in the quorum-sensing bacterium *Vibrio harveyi*. *J. Bacteriol.* 179, 4043–4045.
- [174] Surette, M.G. and Bassler, B.L. (1998) Quorum sensing in *Escherichia coli* and *Salmonella typhimurium*. *Proc. Natl. Acad. Sci. USA* 95, 7046–7050.
- [175] Surette, M.G., Miller, M.B. and Bassler, B.L. (1999) Quorum sensing in *Escherichia coli*, *Salmonella typhimurium*, and *Vibrio harveyi*: a new family of genes responsible for autoinducer production. *Proc. Natl. Acad. Sci. USA* 96, 1639–1644.
- [176] DeLisa, M.P., Valdes, J.J. and Bentley, W.E. (2001) Mapping stress-induced changes in autoinducer AI-2 production in chemostat-cultivated *Escherichia coli* K-12. *J. Bacteriol.* 183, 2918–2928.
- [177] Surette, M.G. and Bassler, B.L. (1999) Regulation of autoinducer production in *Salmonella typhimurium*. *Mol. Microbiol.* 31, 585–595.
- [178] Sperandio, V., Mellies, J.L., Nguyen, W., Shin, S. and Kaper, J.B. (1999) Quorum sensing controls expression of the type III secretion gene transcription and protein secretion in enterohemorrhagic and enteropathogenic *Escherichia coli*. *Proc. Natl. Acad. Sci. USA* 96, 15196–15201.
- [179] Sperandio, V., Torres, A.G., Giron, J.A. and Kaper, J.B. (2001) Quorum sensing is a global regulatory mechanism in enterohemorrhagic *Escherichia coli* O157:H7. *J. Bacteriol.* 183, 5187–5197.
- [180] Day Jr., W.A. and Maurelli, A.T. (2001) *Shigella flexneri* LuxS quorum-sensing system modulates *virB* expression but is not essential for virulence. *Infect. Immun.* 69, 15–23.
- [181] Bassler, B.L. (1999) How bacteria talk to each other: regulation of gene expression by quorum sensing. *Curr. Opin. Microbiol.* 2, 582–587.
- [182] Fuqua, W.C., Winans, S.C. and Greenberg, E.P. (1994) Quorum sensing in bacteria: the LuxR–LuxI family of cell density-responsive transcriptional regulators. *J. Bacteriol.* 176, 269–275.
- [183] Zhu, J., Miller, M.B., Vance, R.E., Dziejman, M., Bassler, B.L. and Mekalanos, J.J. (2002) Quorum-sensing regulators control virulence gene expression in *Vibrio cholerae*. *Proc. Natl. Acad. Sci. USA* 99, 3129–3134.
- [184] Fahlen, T.F., Wilson, R.L., Boddicker, J.D. and Jones, B.D. (2001) Hha is a negative modulator of transcription of *hilA*, the *Salmonella enterica* serovar *typhimurium* invasion gene transcriptional activator. *J. Bacteriol.* 183, 6620–6629.
- [185] DeLisa, M.P., Wu, C.F., Wang, L., Valdes, J.J. and Bentley, W.E. (2001) DNA microarray-based identification of genes controlled by autoinducer 2-stimulated quorum sensing in *Escherichia coli*. *J. Bacteriol.* 183, 5239–5247.

- [186] Bassler, B.L., Wright, M. and Silverman, M.R. (1994) Multiple signalling systems controlling expression of luminescence in *Vibrio harveyi*: sequence and function of genes encoding a second sensory pathway. *Mol. Microbiol.* 13, 273–286.
- [187] Mok, K.C., Wingreen, N.S. and Bassler, B.L. (2003) *Vibrio harveyi* quorum sensing: a coincidence detector for two autoinducers controls gene expression. *EMBO J.* 22, 870–881.
- [188] Frees, D., Vogensen, F.K. and Ingmer, H. (2003) Identification of proteins induced at low pH in *Lactococcus lactis*. *Int. J. Food Microbiol.* 87, 293–300.
- [189] Stancik, L.M., Stancik, D.M., Schmidt, B., Barnhart, D.M., Yoncheva, Y.N. and Slonczewski, J.L. (2002) pH-dependent expression of periplasmic proteins and amino acid catabolism in *Escherichia coli*. *J. Bacteriol.* 184, 4246–4258.
- [190] Dunlap, P.V. (1992) Iron control of the *Vibrio fischeri* luminescence system in *Escherichia coli*. *Arch. Microbiol.* 157, 235–241.
- [191] Dunlap, P.V. and Kuo, A. (1992) Cell density-dependent modulation of the *Vibrio fischeri* luminescence system in the absence of autoinducer and LuxR protein. *J. Bacteriol.* 174, 2440–2448.
- [192] Canny, G., Levy, O., Furuta, G.T., Narravula-Alipati, S., Sisson, R.B., Serhan, C.N. and Colgan, S.P. (2002) Lipid mediator-induced expression of bactericidal/permeability-increasing protein (BPI) in human mucosal epithelia. *Proc. Natl. Acad. Sci. USA* 99, 3902–3907.
- [193] Bals, R. and Wilson, J.M. (2003) Cathelicidins – a family of multifunctional antimicrobial peptides. *Cell Mol. Life Sci.* 60, 711–720.
- [194] Hancock, R.E. and Scott, M.G. (2000) The role of antimicrobial peptides in animal defenses. *Proc. Natl. Acad. Sci. USA* 97, 8856–8861.
- [195] Wu, H., Zhang, G., Minton, J.E., Ross, C.R. and Blecha, F. (2000) Regulation of cathelicidin gene expression: induction by lipopolysaccharide, interleukin-6, retinoic acid, and *Salmonella enterica* serovar *typhimurium* infection. *Infect. Immun.* 68, 5552–5558.
- [196] Guo, L., Lim, K.B., Poduje, C.M., Daniel, M., Gunn, J.S., Hackett, M. and Miller, S.I. (1998) Lipid A acylation and bacterial resistance against vertebrate antimicrobial peptides. *Cell* 95, 189–198.
- [197] Zhang, L., Rozek, A. and Hancock, R.E. (2001) Interaction of cationic antimicrobial peptides with model membranes. *J. Biol. Chem.* 276, 35714–35722.
- [198] Scott, M.G., Yan, H. and Hancock, R.E. (1999) Biological properties of structurally related alpha-helical cationic antimicrobial peptides. *Infect. Immun.* 67, 2005–2009.
- [199] Gunn, J.S., Lim, K.B., Krueger, J., Kim, K., Guo, L., Hackett, M. and Miller, S.I. (1998) PmrA–PmrB-regulated genes necessary for 4-aminoarabinose lipid A modification and polymyxin resistance. *Mol. Microbiol.* 27, 1171–1182.
- [200] Guina, T., Yi, E.C., Wang, H., Hackett, M. and Miller, S.I. (2000) A PhoP-regulated outer membrane protease of *Salmonella enterica* serovar *typhimurium* promotes resistance to alpha-helical antimicrobial peptides. *J. Bacteriol.* 182, 4077–4086.
- [201] Trent, M.S., Pabich, W., Raetz, C.R. and Miller, S.I. (2001) A PhoP/PhoQ-induced Lipase (PagL) that catalyzes 3-*O*-deacylation of lipid A precursors in membranes of *Salmonella typhimurium*. *J. Biol. Chem.* 276, 9083–9092.
- [202] Gunn, J.S. and Miller, S.I. (1996) PhoP–PhoQ activates transcription of *pmrAB*, encoding a two-component regulatory system involved in *Salmonella typhimurium* antimicrobial peptide resistance. *J. Bacteriol.* 178, 6857–6864.
- [203] Mouslim, C. and Groisman, E.A. (2003) Control of the *Salmonella ugd* gene by three two-component regulatory systems. *Mol. Microbiol.* 47, 335–344.
- [204] McLeod, G.I. and Spector, M.P. (1996) Starvation- and Stationary-phase-induced resistance to the antimicrobial peptide polymyxin B in *Salmonella typhimurium* is RpoS ( $\sigma^S$ ) independent and occurs through both *phoP*-dependent and -independent pathways. *J. Bacteriol.* 178, 3683–3688.
- [205] Groisman, E.A., Parra-Lopez, C., Salcedo, M., Lipps, C.J. and Heffron, F. (1992) Resistance to host antimicrobial peptides is necessary for *Salmonella* virulence. *Proc. Natl. Acad. Sci. USA* 89, 11939–11943.
- [206] Bader, M.W., Navarre, W.W., Shiau, W., Nikaido, H., Frye, J.G., McClelland, M., Fang, F.C. and Miller, S.I. (2003) Regulation of *Salmonella typhimurium* virulence gene expression by cationic antimicrobial peptides. *Mol. Microbiol.* 50, 219–230.
- [207] Barker, H.C., Kinsella, N., Jaspe, A., Friedrich, T. and O'Connor, C.D. (2000) Formate protects stationary-phase *Escherichia coli* and *Salmonella* cells from killing by a cationic antimicrobial peptide. *Mol. Microbiol.* 35, 1518–1529.
- [208] Deiwick, J. and Hensel, M. (1999) Regulation of virulence genes by environmental signals in *Salmonella typhimurium*. *Electrophoresis* 20, 813–817.
- [209] Krishnakumar, R., Craig, M., Imlay, J.A. and Schlauch, J.M. (2004) Differences in enzymatic properties allow SodCI but not SodCII to contribute to virulence in *Salmonella enterica* serovar *typhimurium* strain 14028. *J. Bacteriol.* 186, 5230–5238.
- [210] Uzau, S., Bossi, L. and Figueroa-Bossi, N. (2002) Differential accumulation of *Salmonella* [Cu, Zn] superoxide dismutases SodCI and SodCII in intracellular bacteria: correlation with their relative contribution to pathogenicity. *Mol. Microbiol.* 46, 147–156.
- [211] Eriksson, S., Lucchini, S., Thompson, A., Rhen, M. and Hinton, J.C. (2003) Unravelling the biology of macrophage infection by gene expression profiling of intracellular *Salmonella enterica*. *Mol. Microbiol.* 47, 103–118.
- [212] Papp-Szabo, E., Firtel, M. and Josephy, P.D. (1994) Comparison of the sensitivities of *Salmonella typhimurium oxyR* and *katG* mutants to killing by human neutrophils. *Infect. Immun.* 62, 2662–2668.
- [213] Fang, F.C., Vazquez-Torres, A. and Xu, Y. (1997) The transcriptional regulator SoxS is required for resistance of *Salmonella typhimurium* to paraquat but not for virulence in mice. *Infect. Immun.* 65, 5371–5375.
- [214] Pomposiello, P.J. and Demple, B. (2000) Identification of SoxS-regulated genes in *Salmonella enterica* serovar *typhimurium*. *J. Bacteriol.* 182, 23–29.
- [215] Miller, S.I., Loomis, W.P., Alpuche-Aranda, C., Behlau, I. and Hohmann, E. (1993) The PhoP virulence regulon and live oral *Salmonella* vaccines. *Vaccine* 11, 122–125.
